# Supplementary material for: 1,2,3-Triazoles derived from olanzapine: their synthesis via an ultrasound assisted CuAAC method and evaluation as inhibitors of PDE4B
Source: Royal Society of Chemistry journal article supplement (doi:10.1039/c5ra20380e), 2015-01-01

$^1\text{H}$  NMR of **3a** (400 MHz,  $\text{CDCl}_3$ )

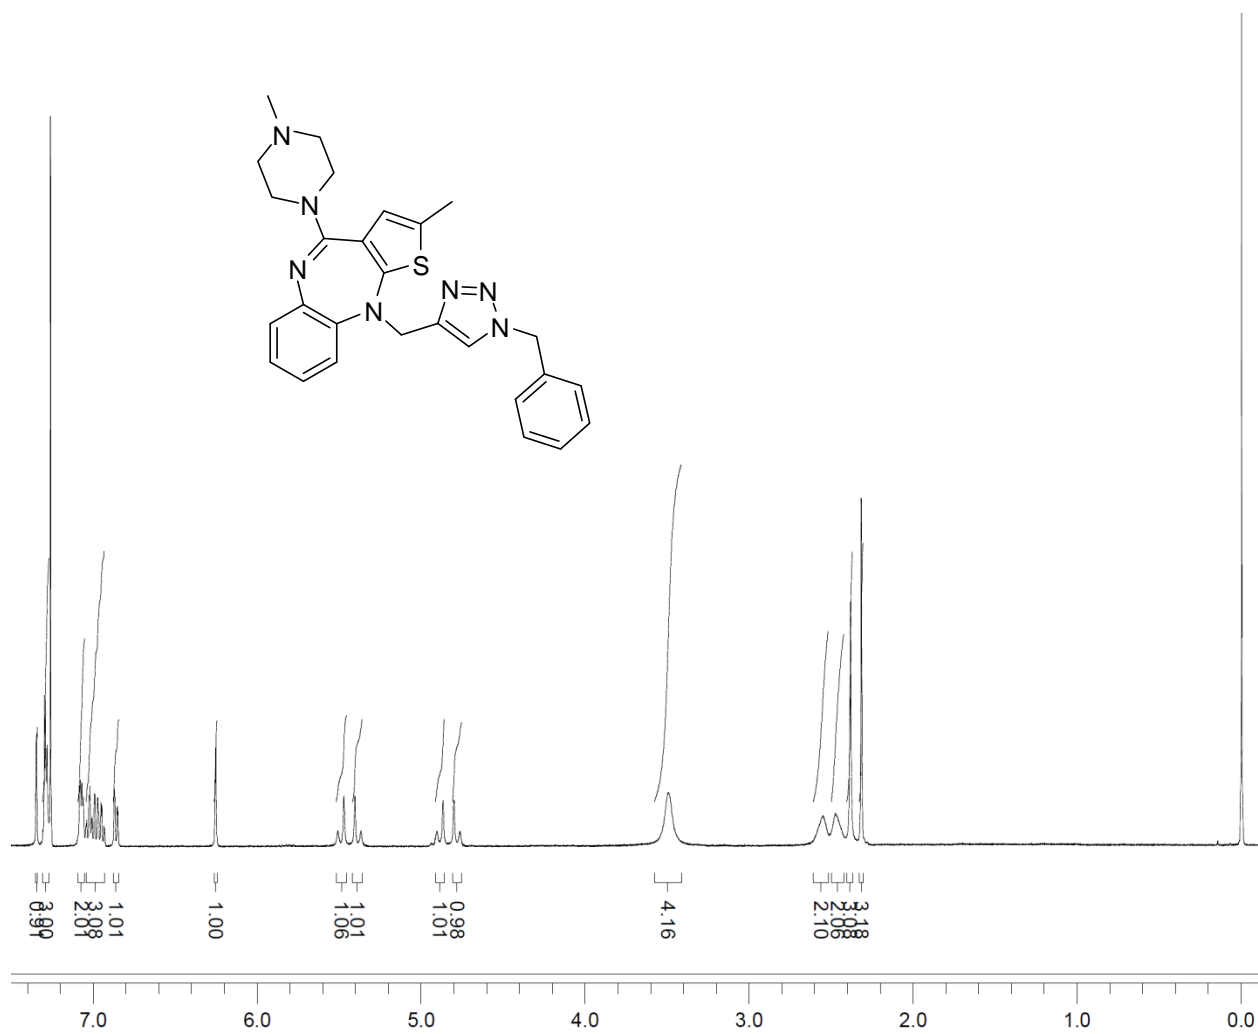

$^{13}\text{C}$  NMR of **3a** (100 MHz,  $\text{CDCl}_3$ )

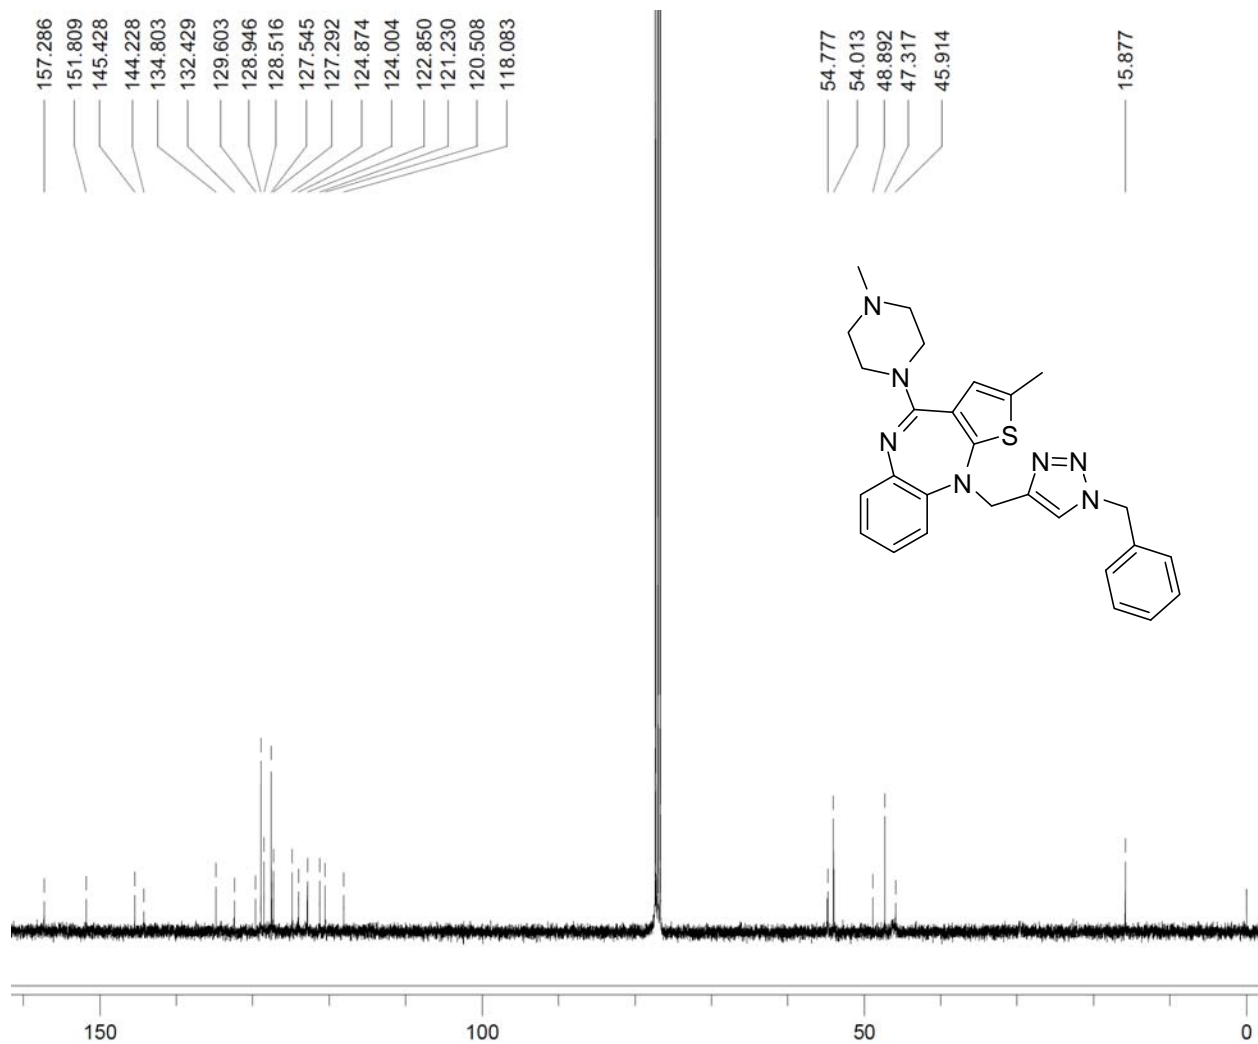

$^1\text{H}$  NMR of **3b** (400 MHz,  $\text{CDCl}_3$ )

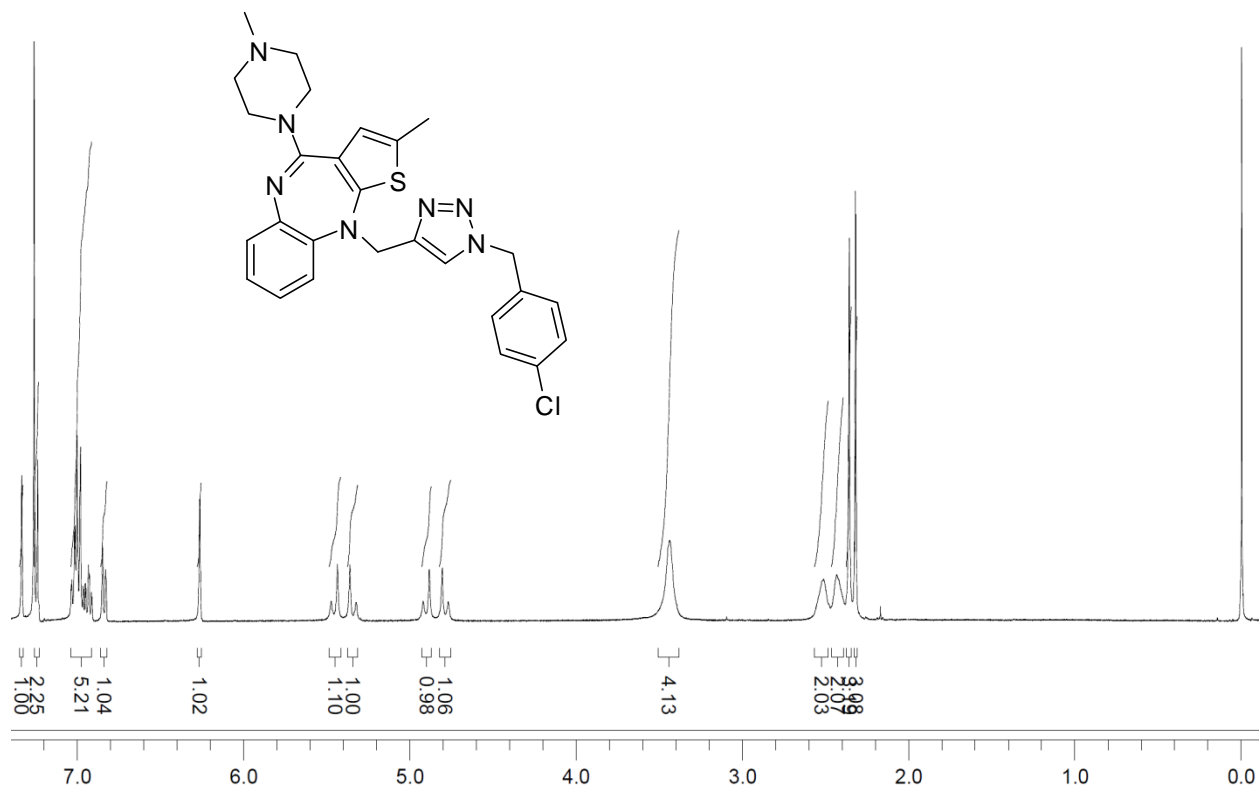

$^{13}\text{C}$  NMR of **3b** (100 MHz,  $\text{CDCl}_3$ )

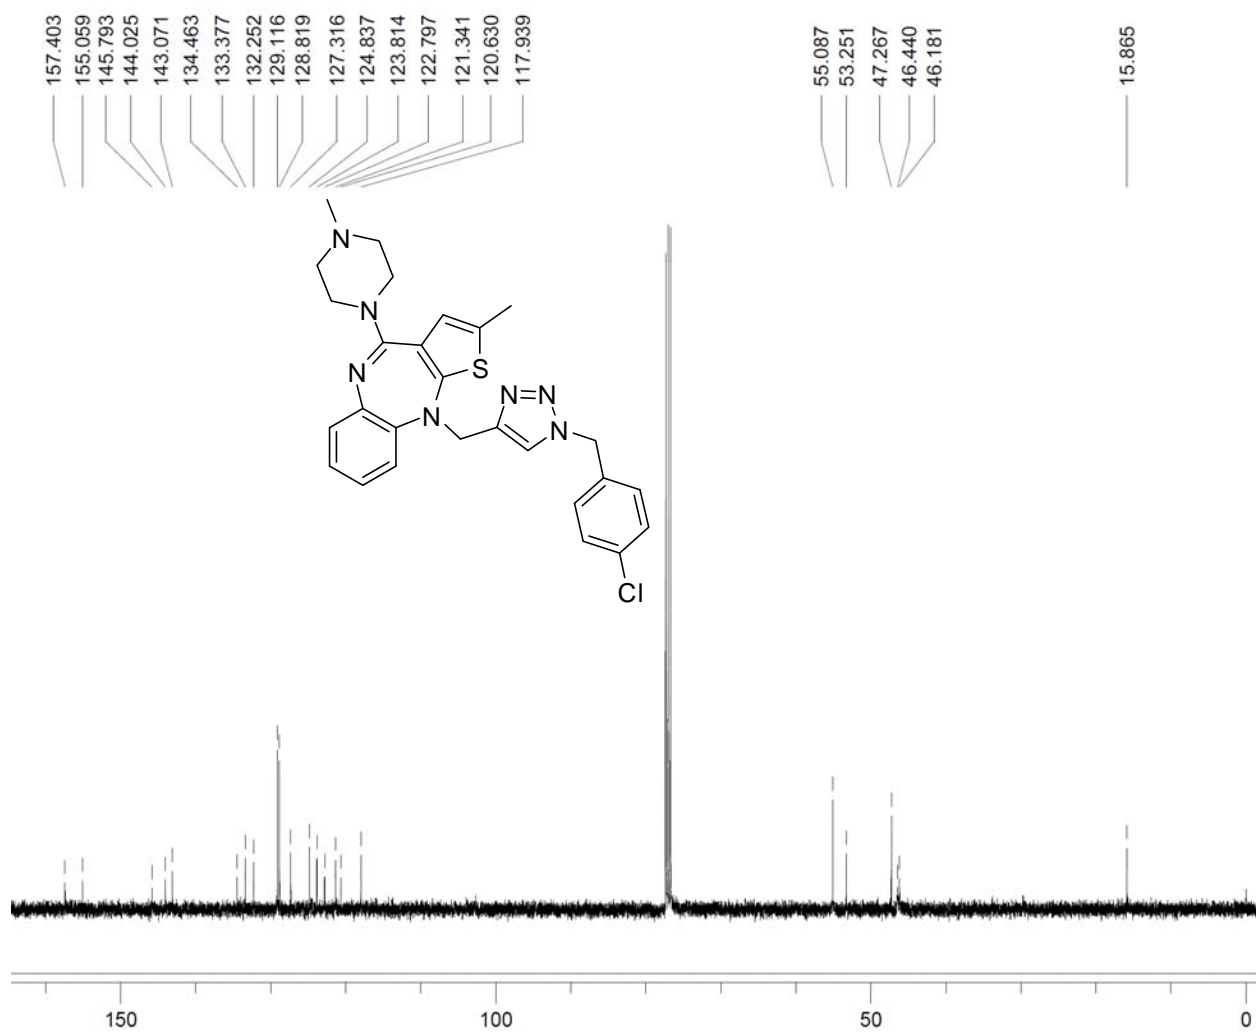

$^1\text{H}$  NMR of **3c** (400 MHz,  $\text{CDCl}_3$ )

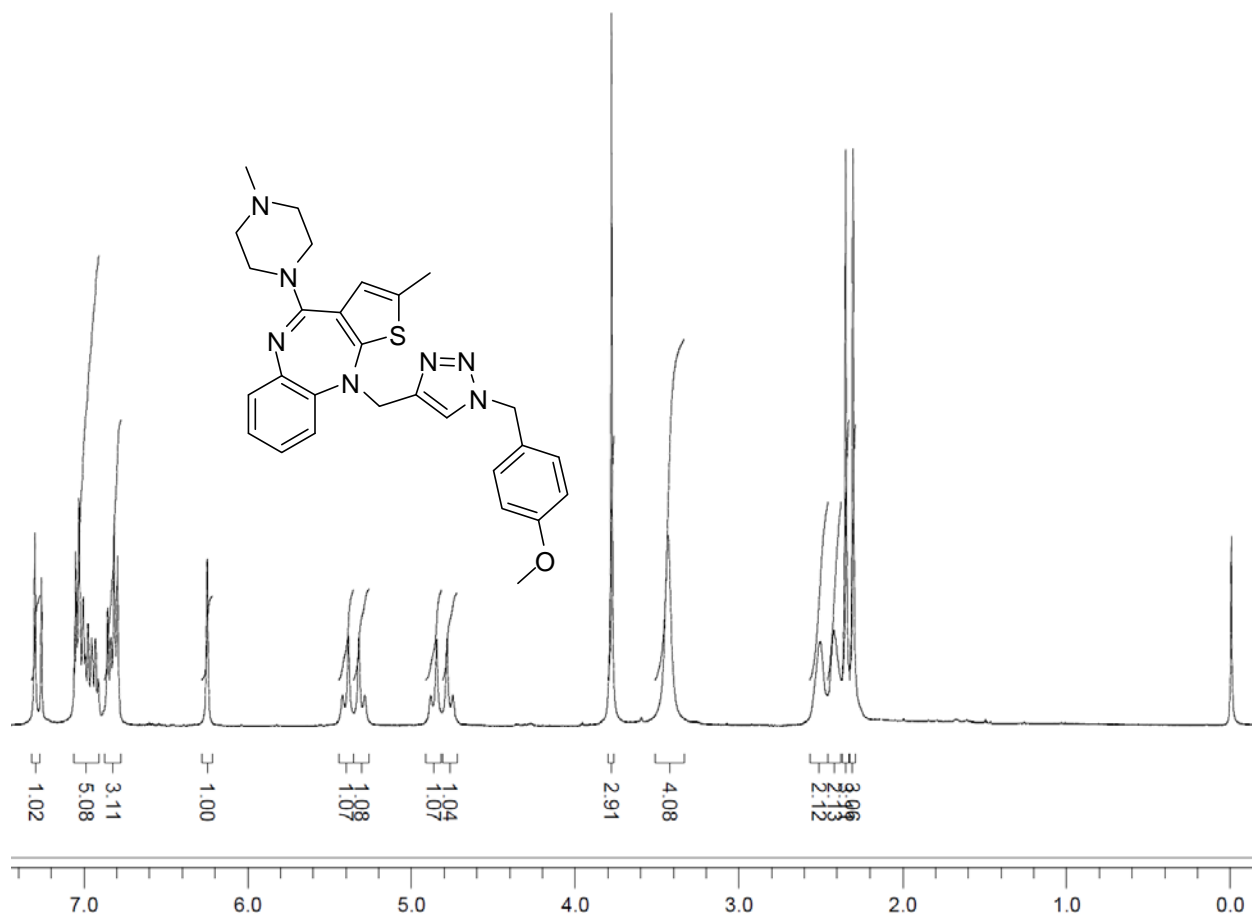

$^{13}\text{C}$  NMR of **3c** (100 MHz,  $\text{CDCl}_3$ )

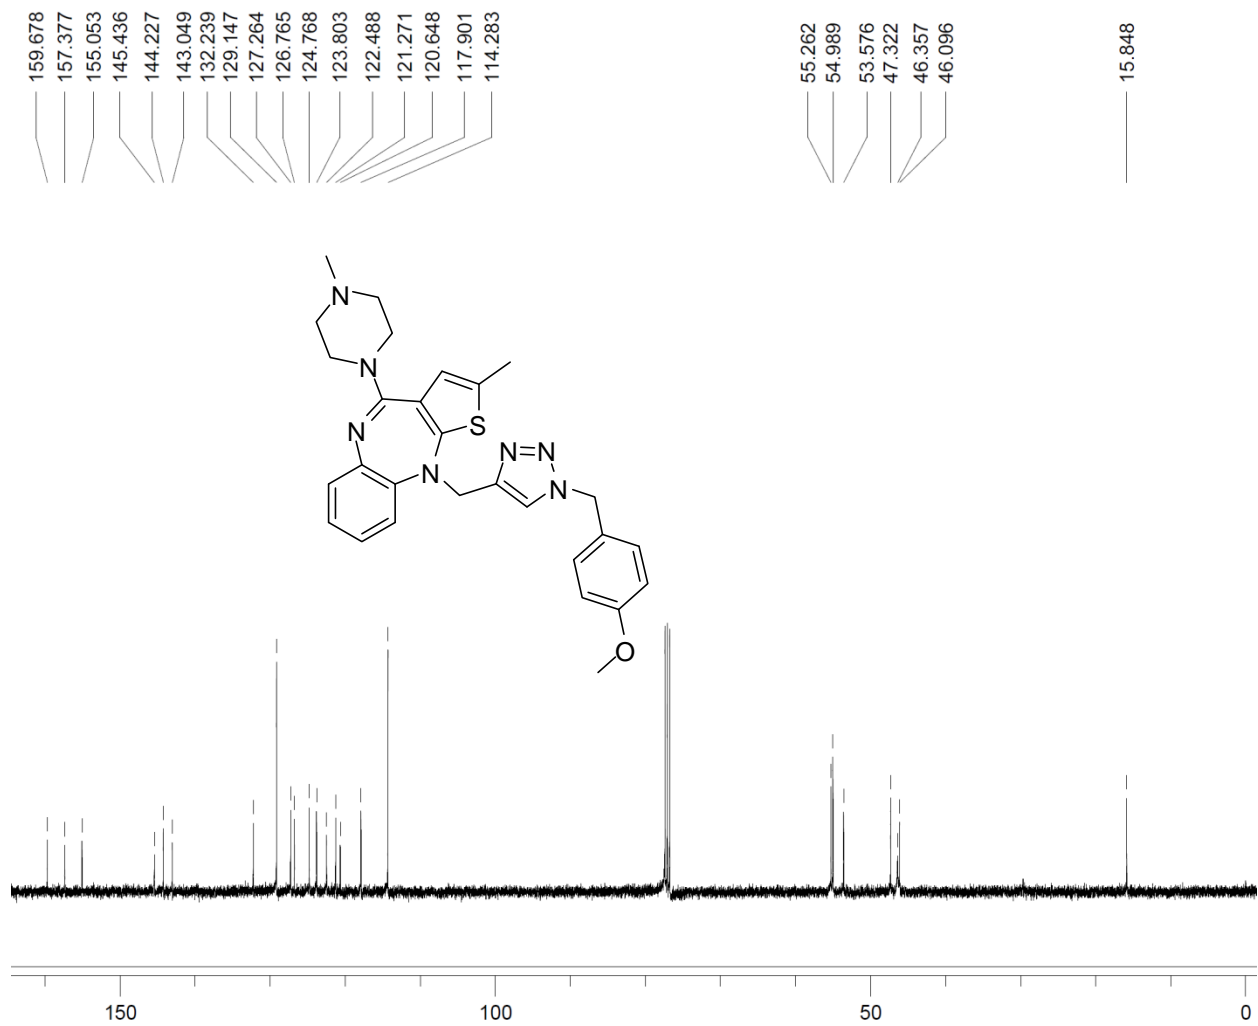

$^1\text{H}$  NMR of **3d** (400 MHz,  $\text{CDCl}_3$ )

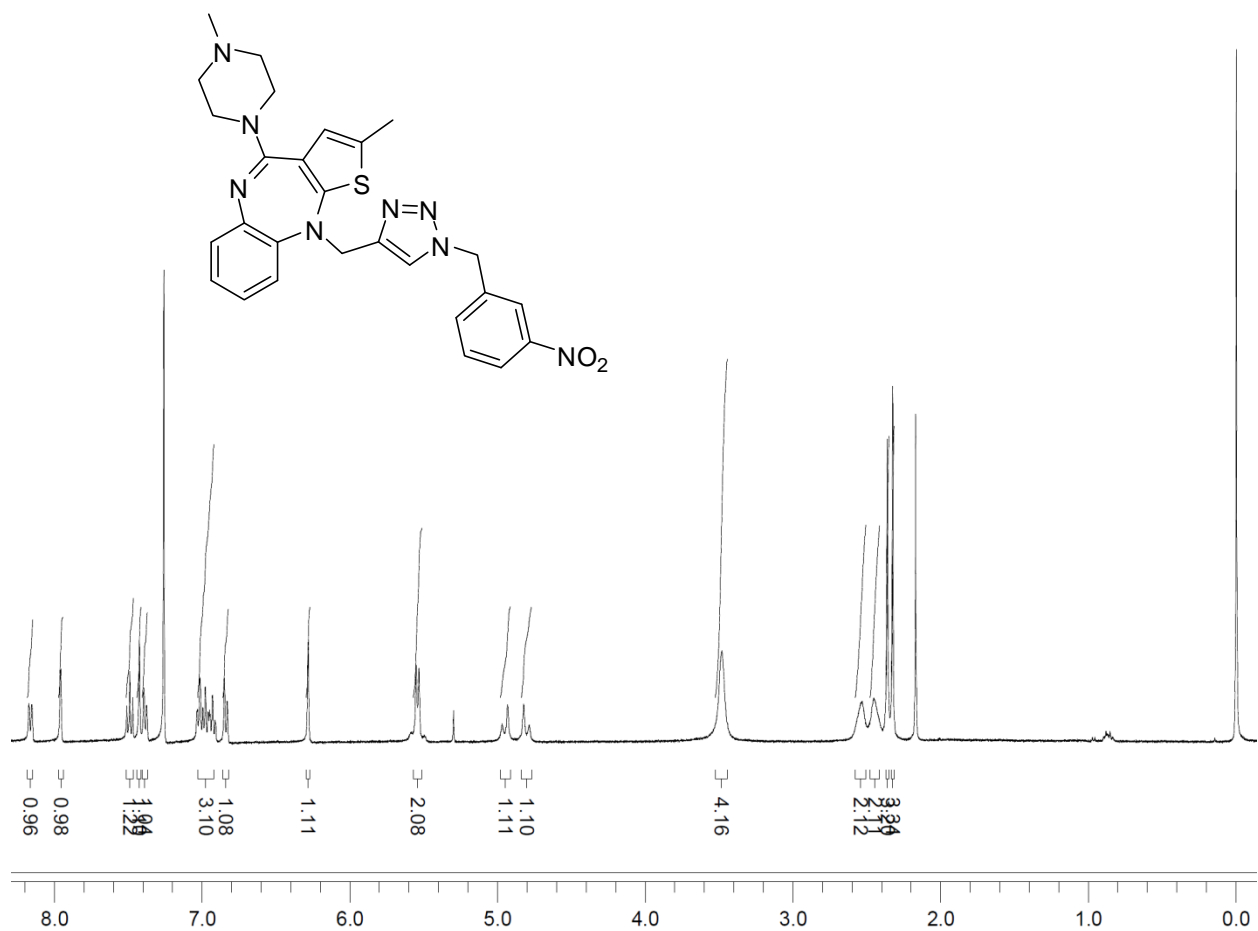

$^{13}\text{C}$  NMR of **3d** (100 MHz,  $\text{CDCl}_3$ )

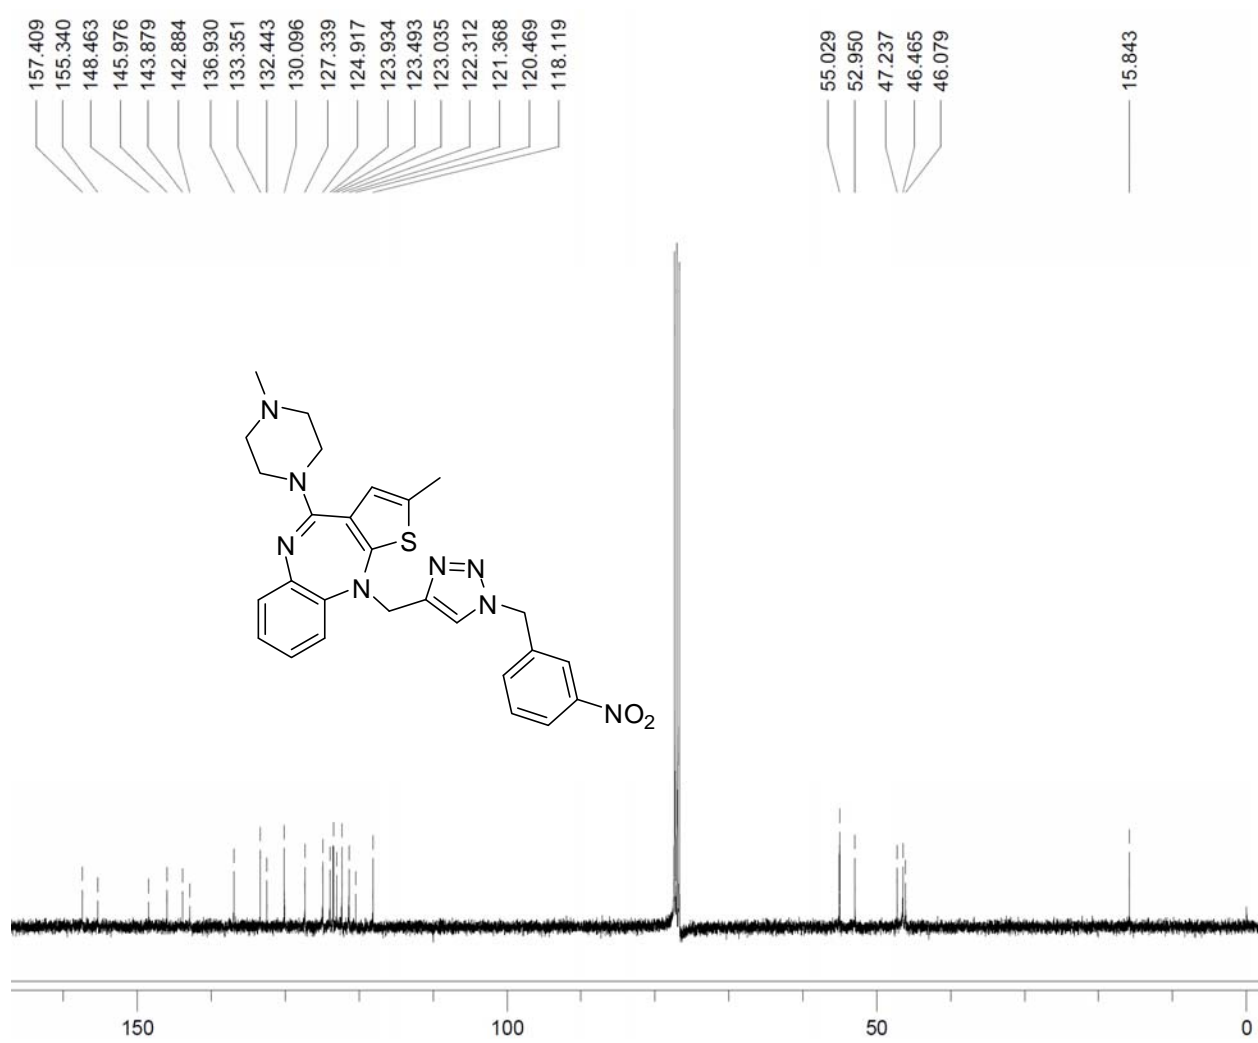



$^1\text{H}$  NMR of **3e** (400 MHz,  $\text{CDCl}_3$ )

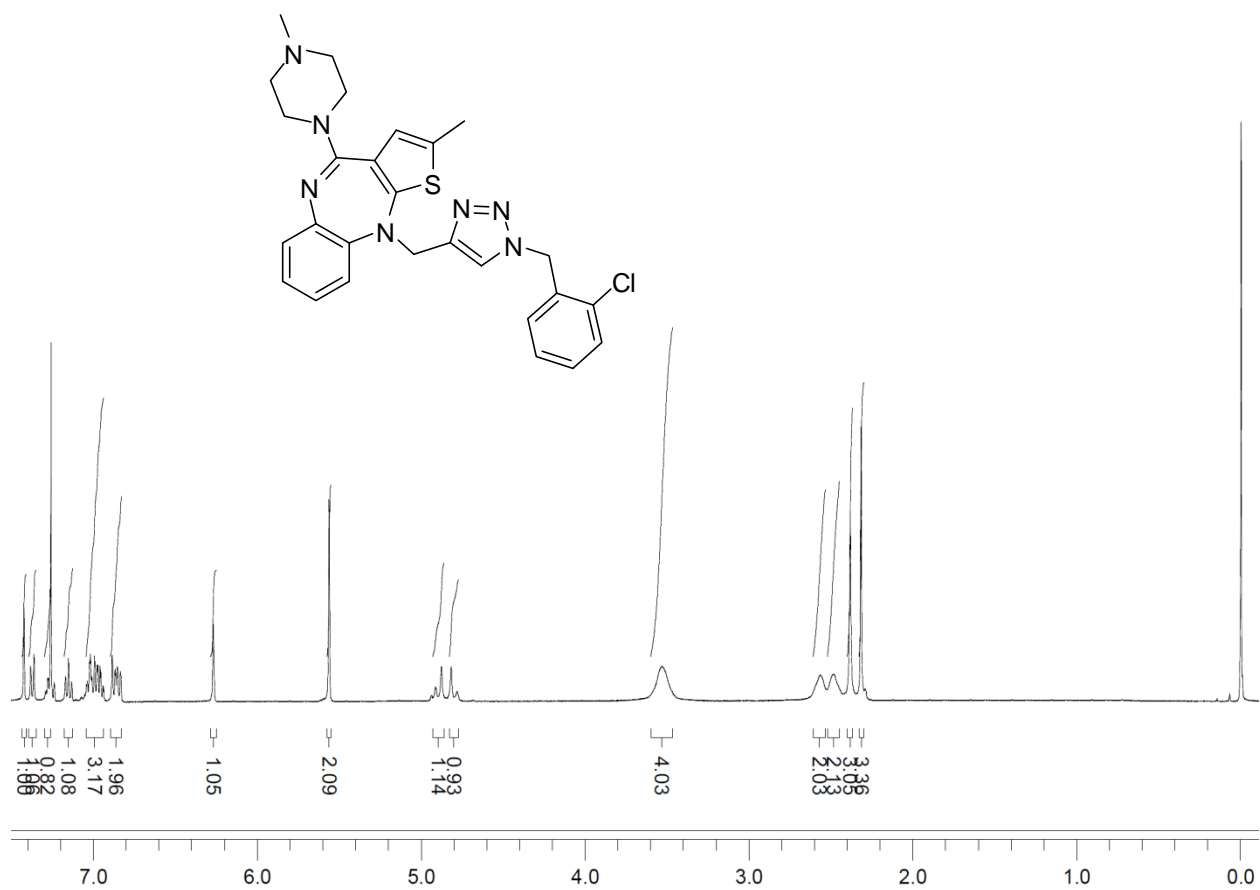

$^{13}\text{C}$  NMR of **3e** (100 MHz,  $\text{CDCl}_3$ )

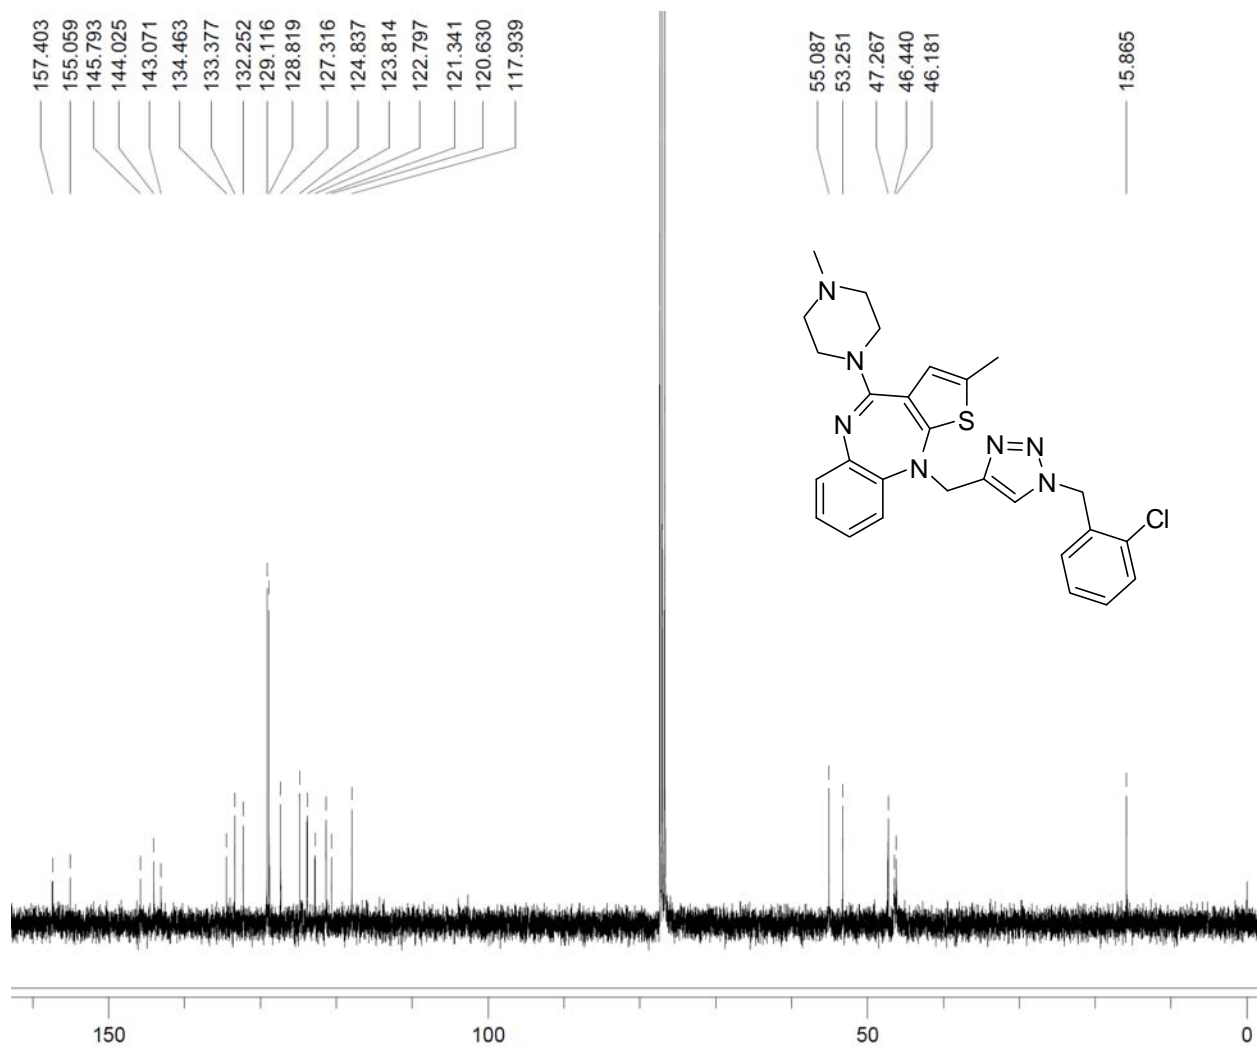

$^1\text{H}$  NMR of **3f** (400 MHz,  $\text{CDCl}_3$ )

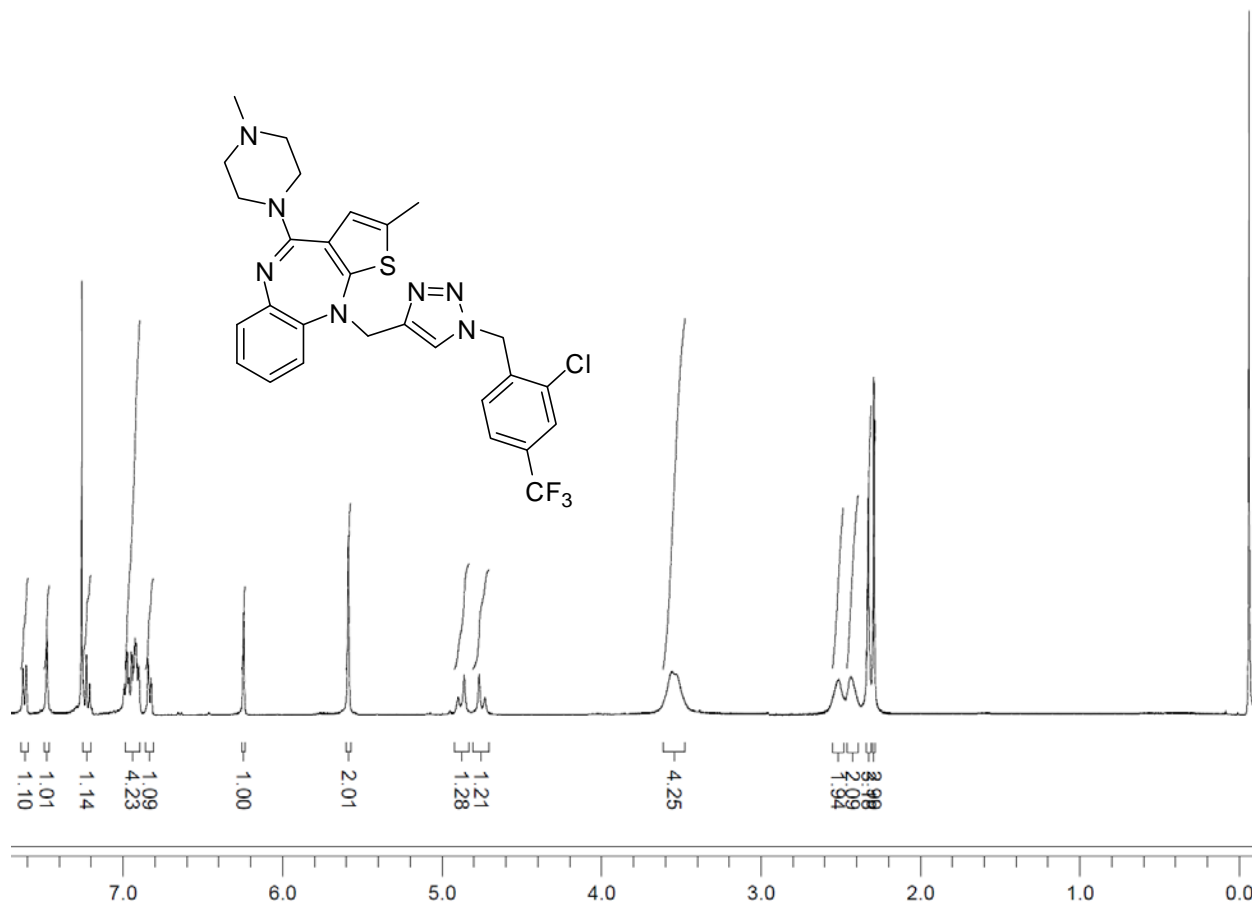

$^{13}\text{C}$  NMR of **3f** (100 MHz, DMSO- $\text{D}_6$ )

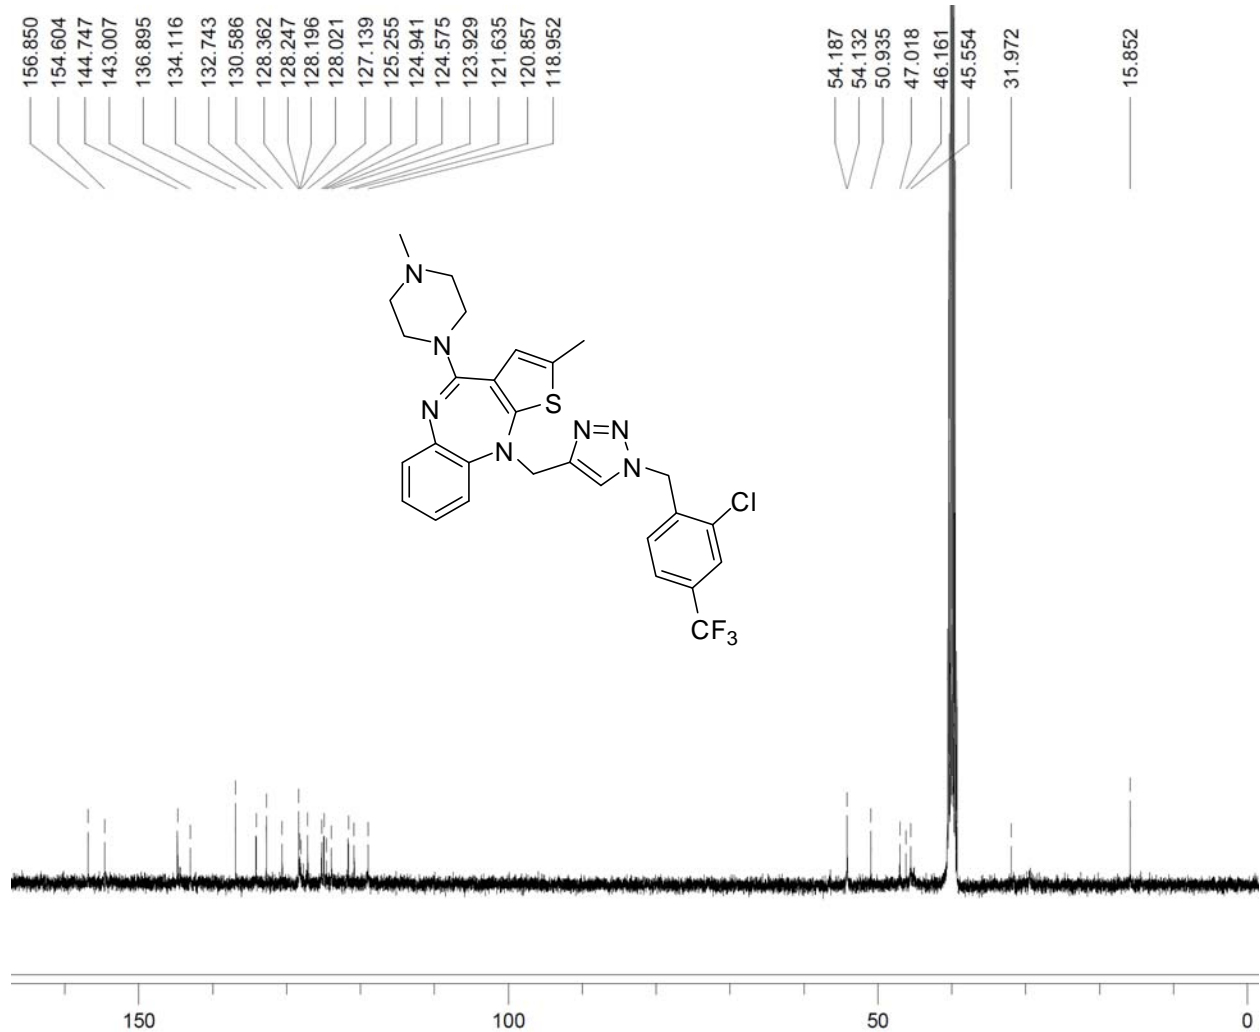

$^1\text{H}$  NMR of **3g** (400 MHz,  $\text{CDCl}_3$ )

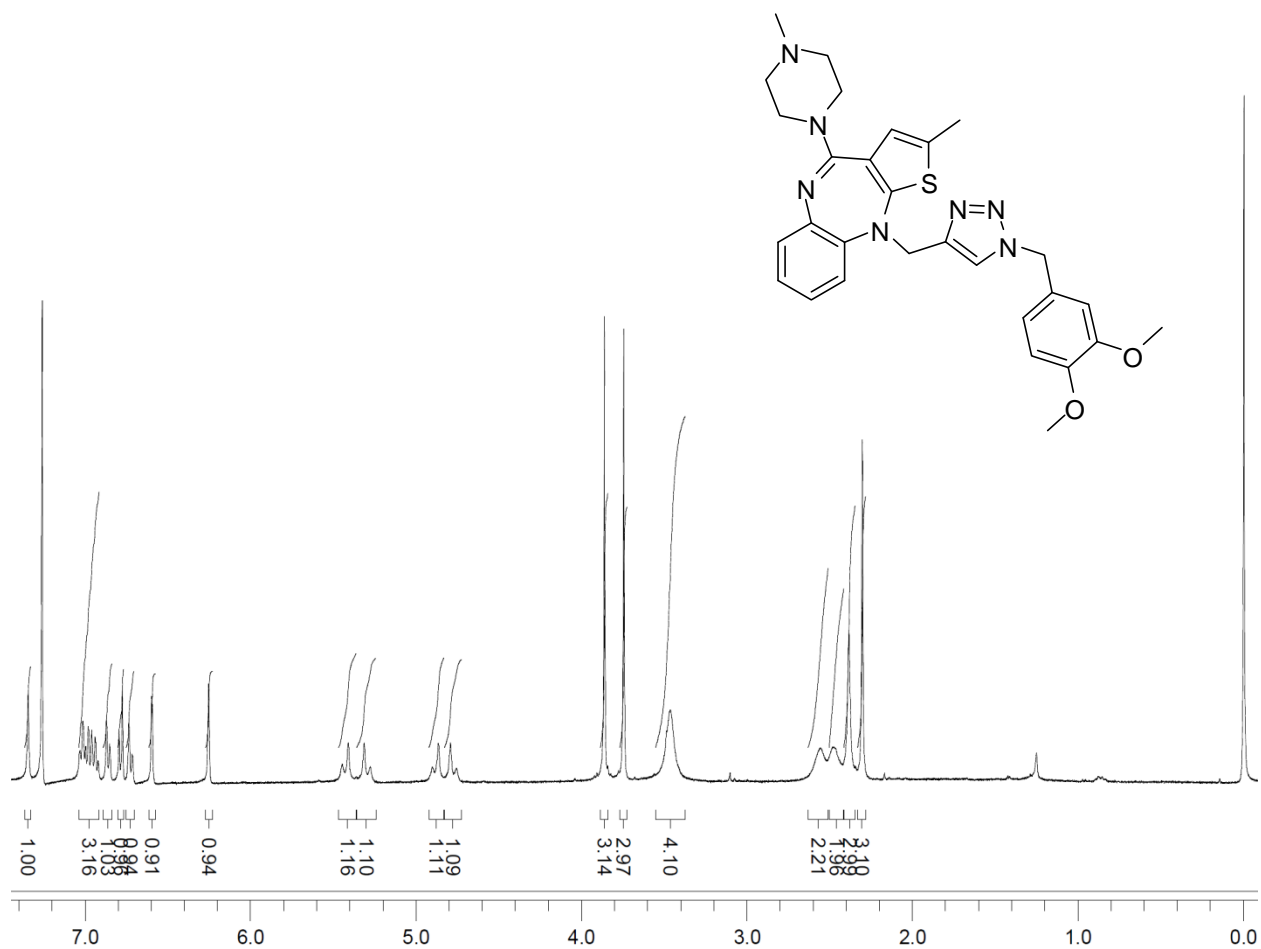

$^{13}\text{C}$  NMR of **3g** (100 MHz,  $\text{CDCl}_3$ )

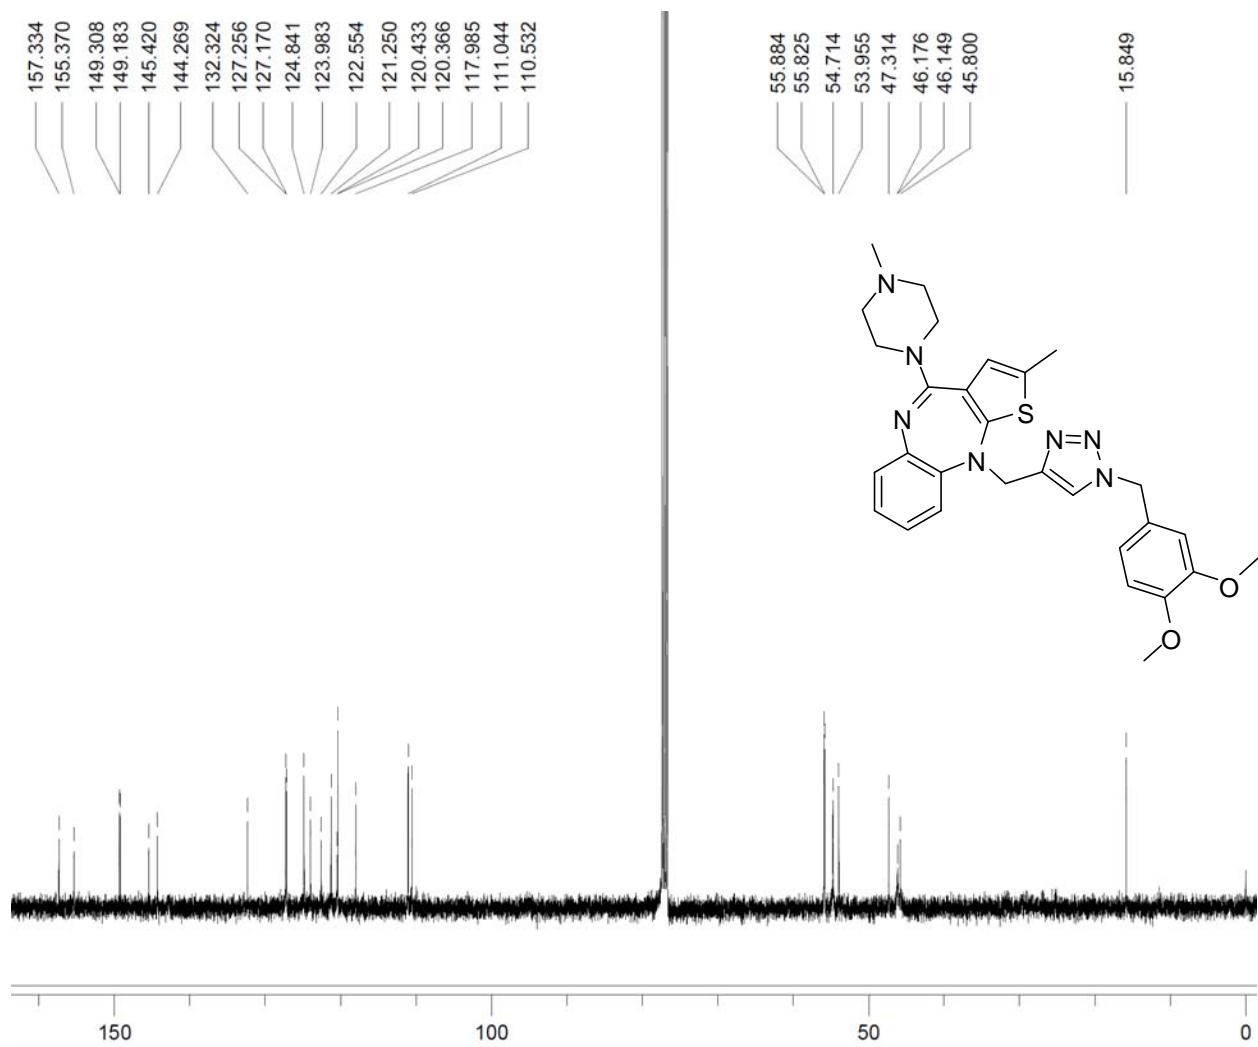

$^1\text{H}$  NMR of **3h** (400 MHz,  $\text{CDCl}_3$ )

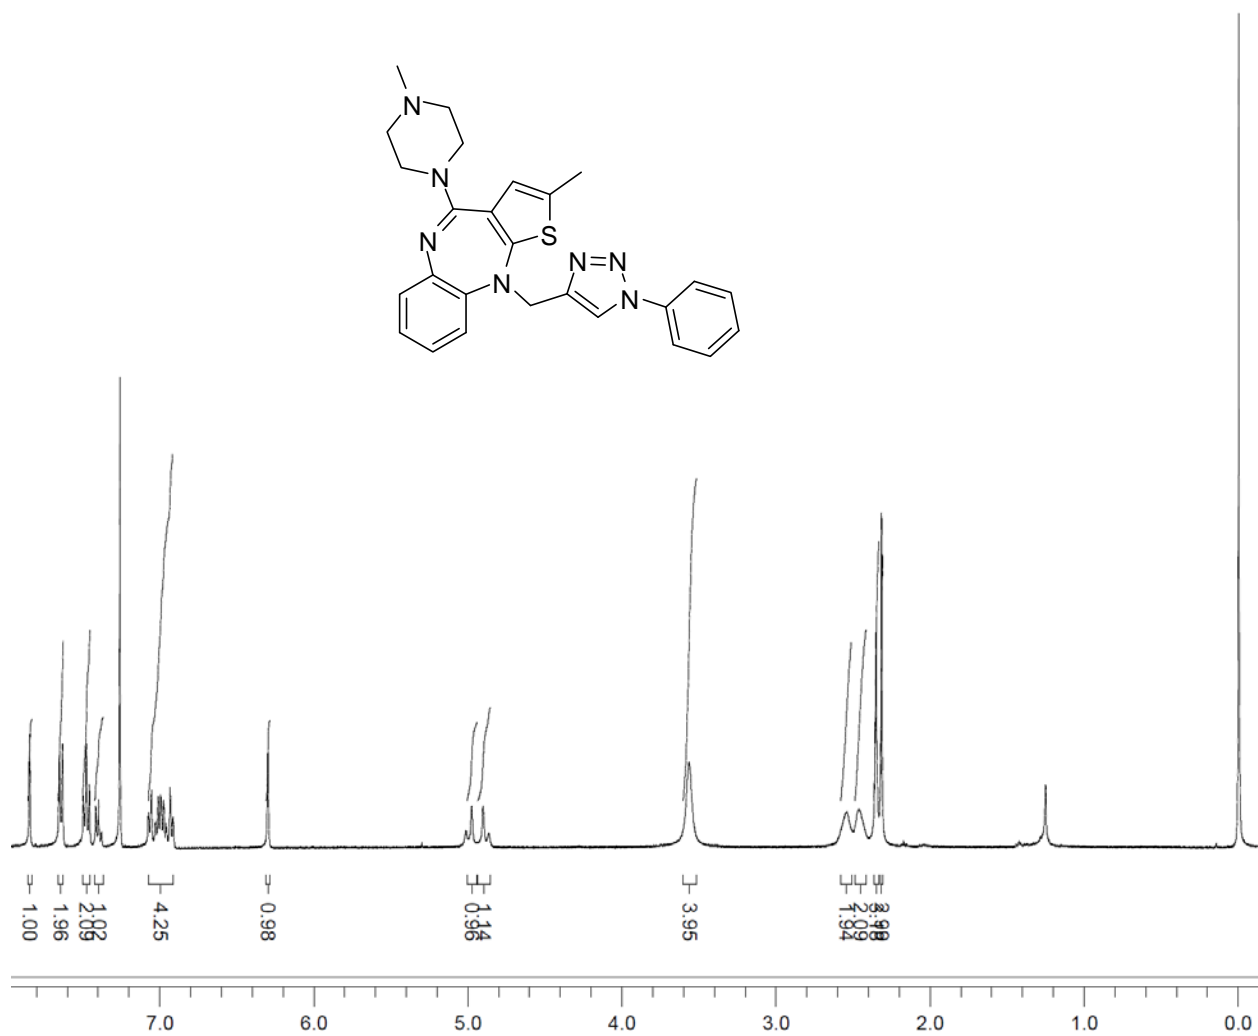

$^{13}\text{C}$  NMR of **3h** (100 MHz,  $\text{CDCl}_3$ )

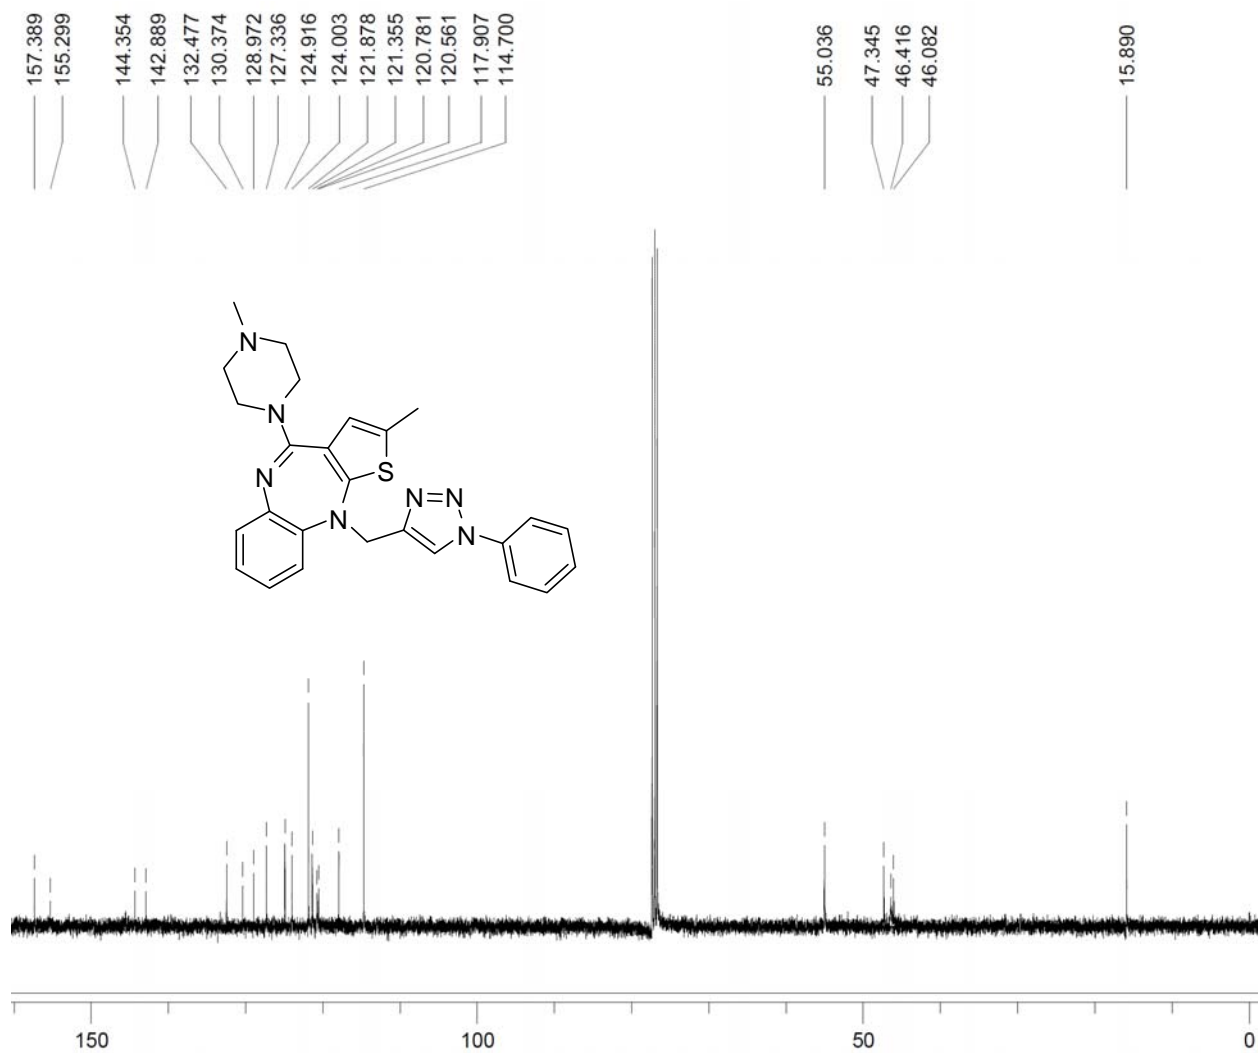



$^1\text{H}$  NMR of **3i** (400 MHz,  $\text{CDCl}_3$ )

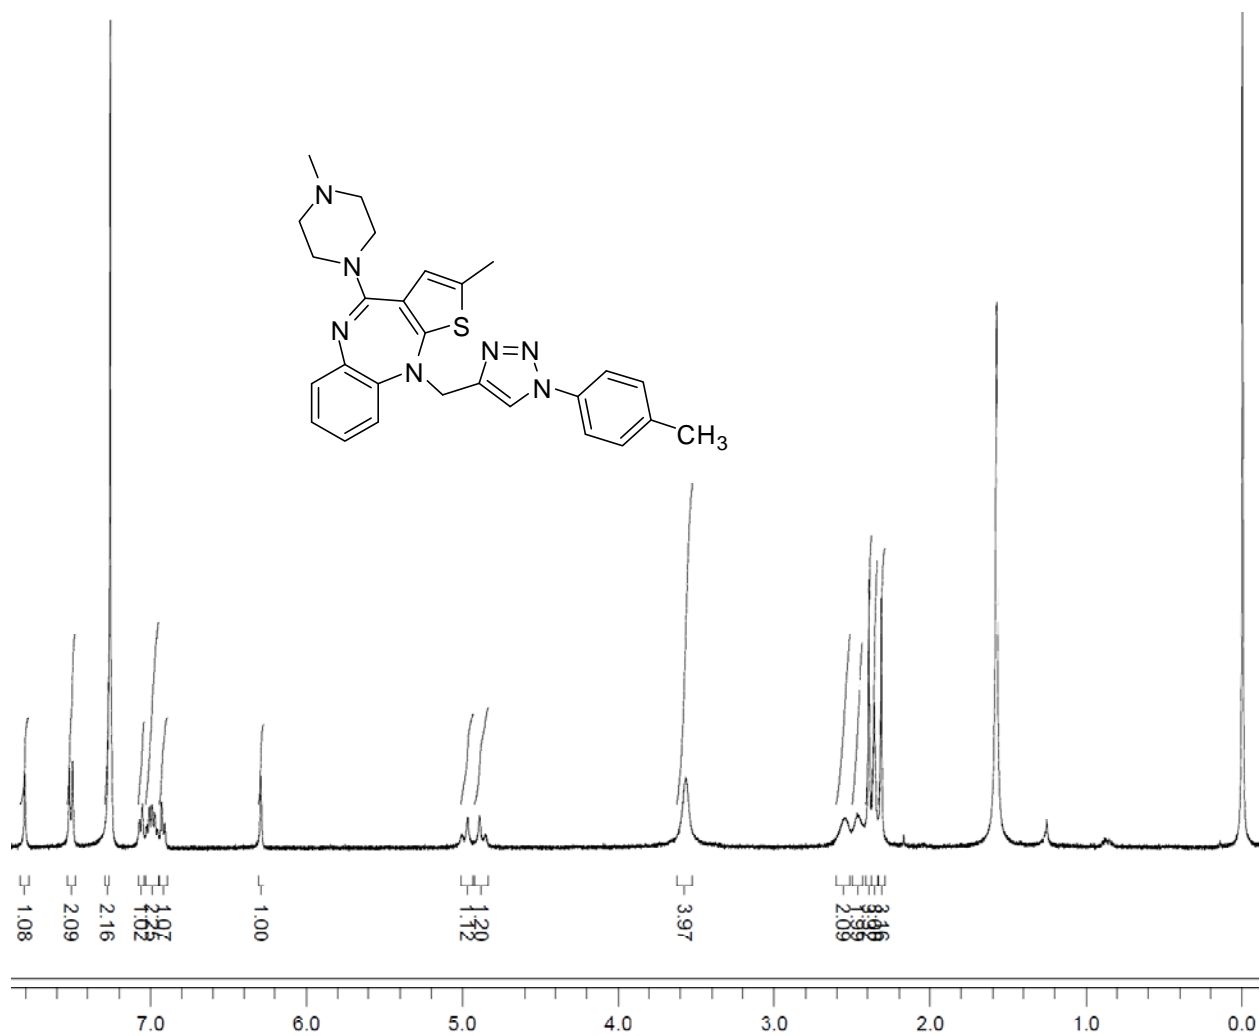

$^{13}\text{C}$  NMR of **3i** (100 MHz,  $\text{CDCl}_3$ )

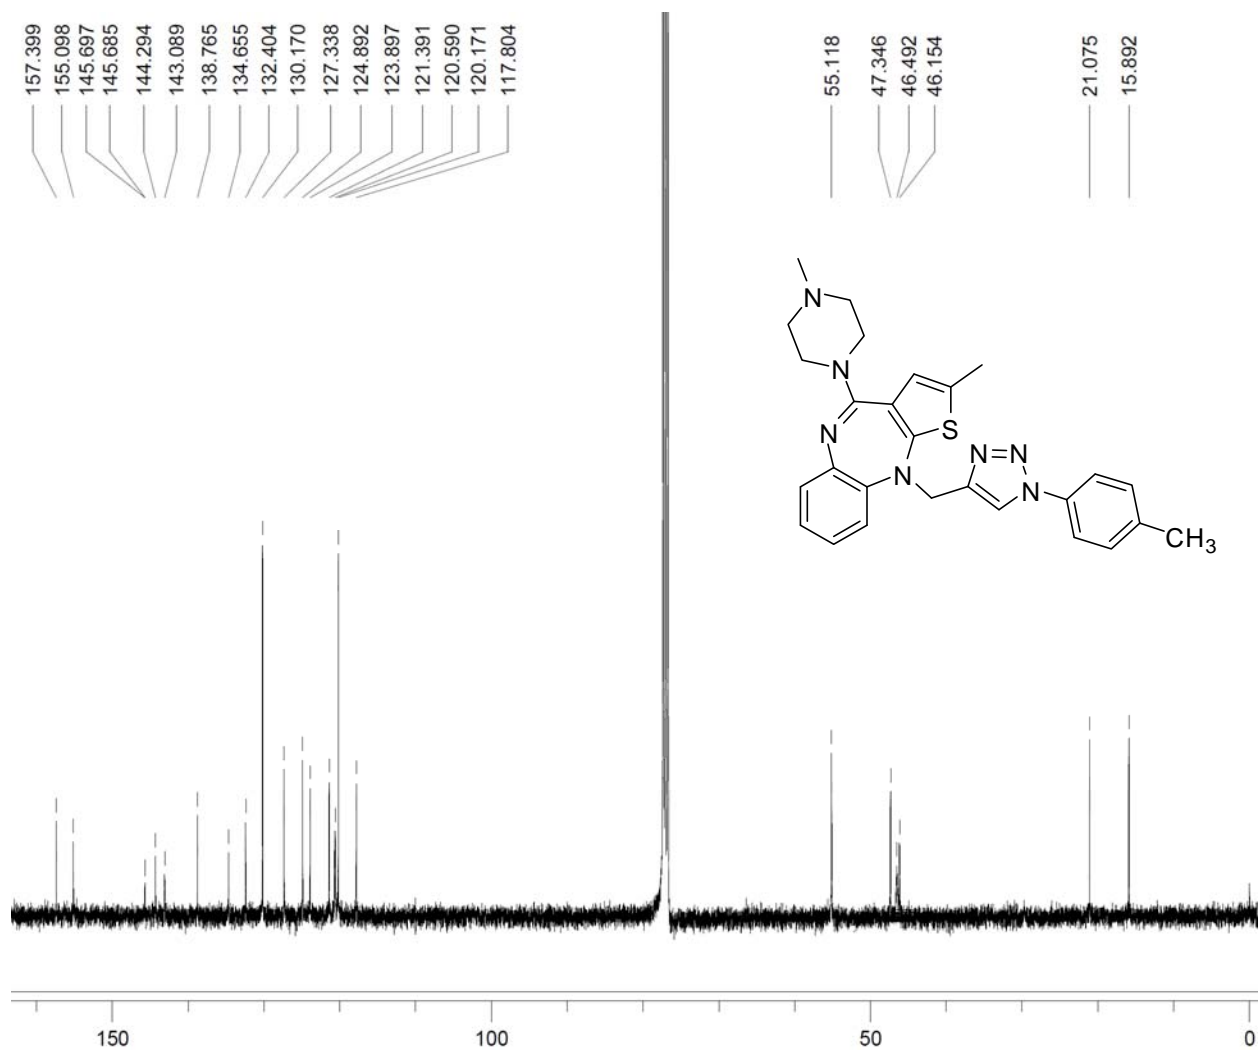

$^1\text{H}$  NMR of **3j** (400 MHz,  $\text{CDCl}_3$ )

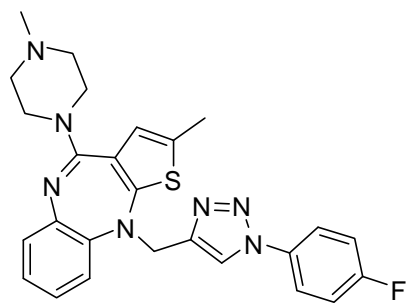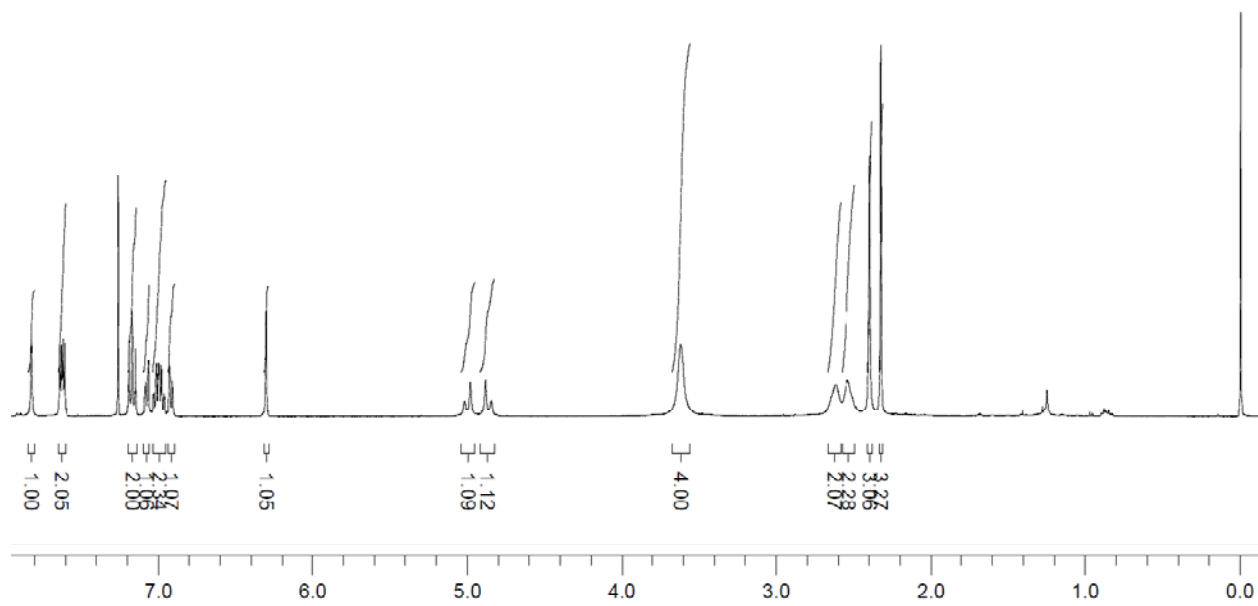

$^{13}\text{C}$  NMR of **3j** (100 MHz,  $\text{CDCl}_3$ )

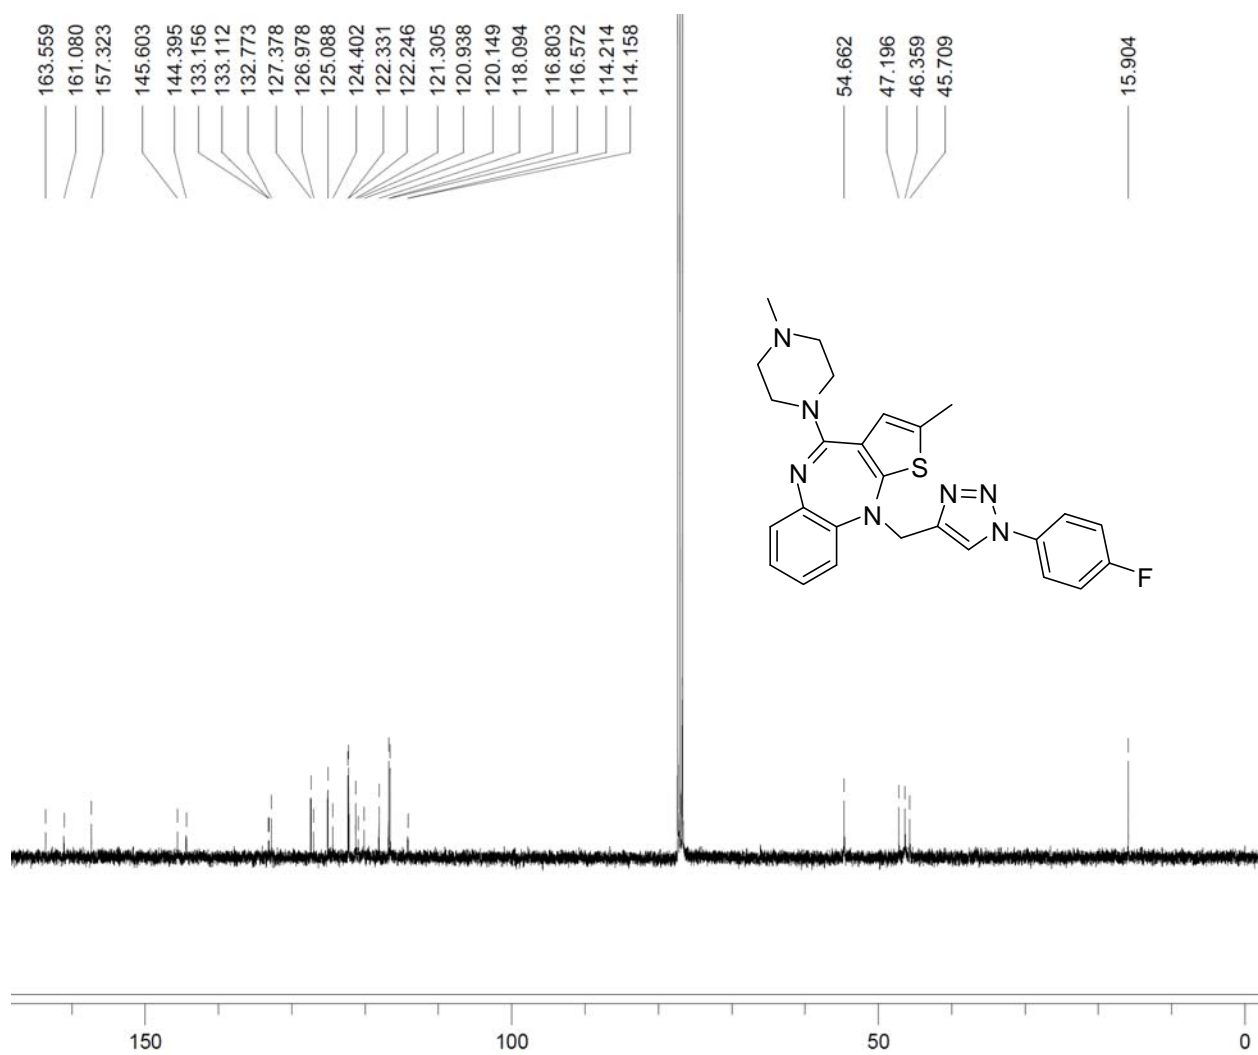

$^1\text{H}$  NMR of **3k** (400 MHz,  $\text{CDCl}_3$ )

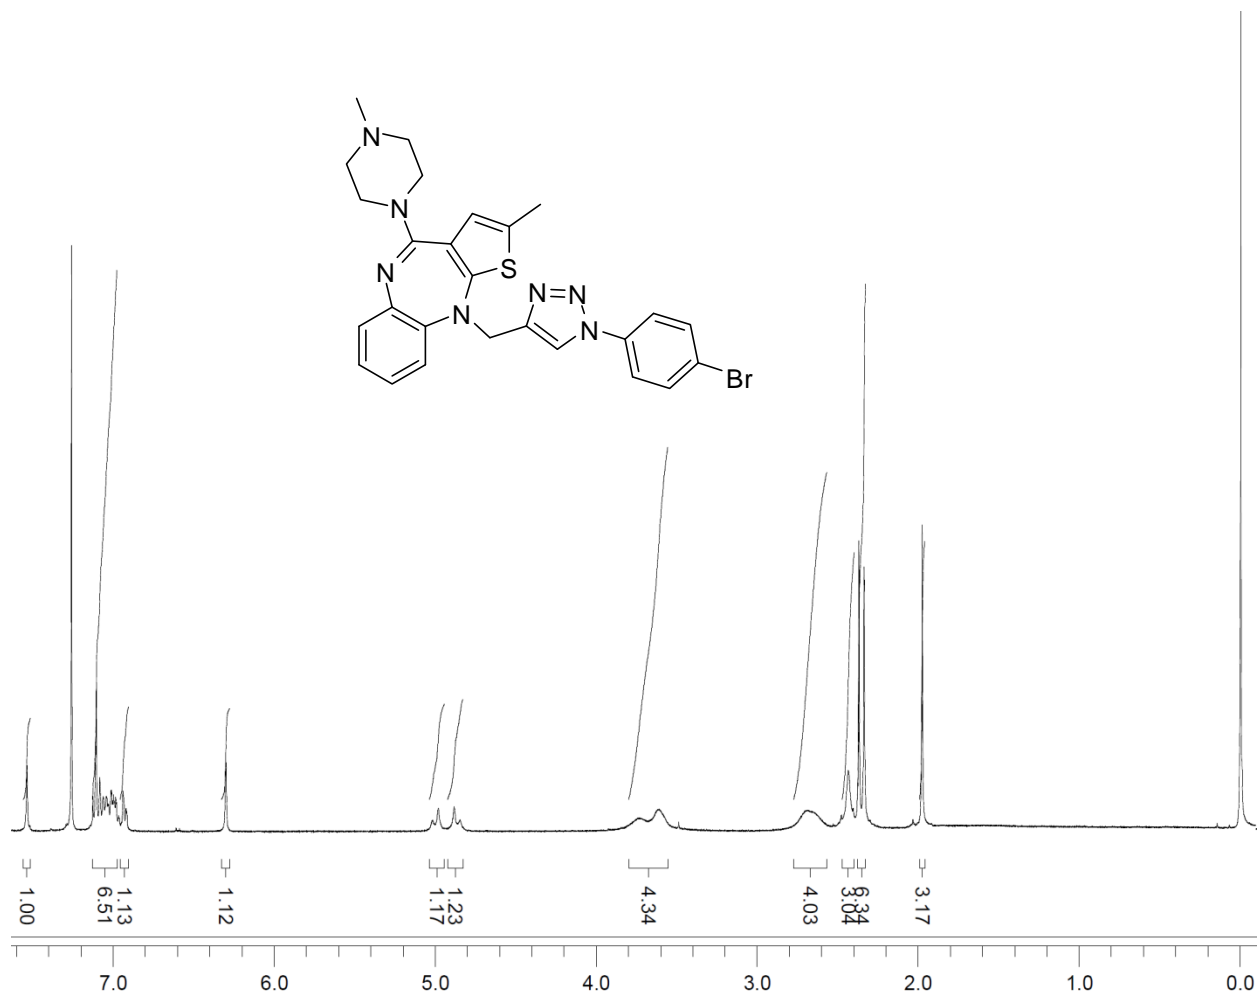

$^{13}\text{C}$  NMR of **3k** (100 MHz, DMSO- $\text{D}_6$ )

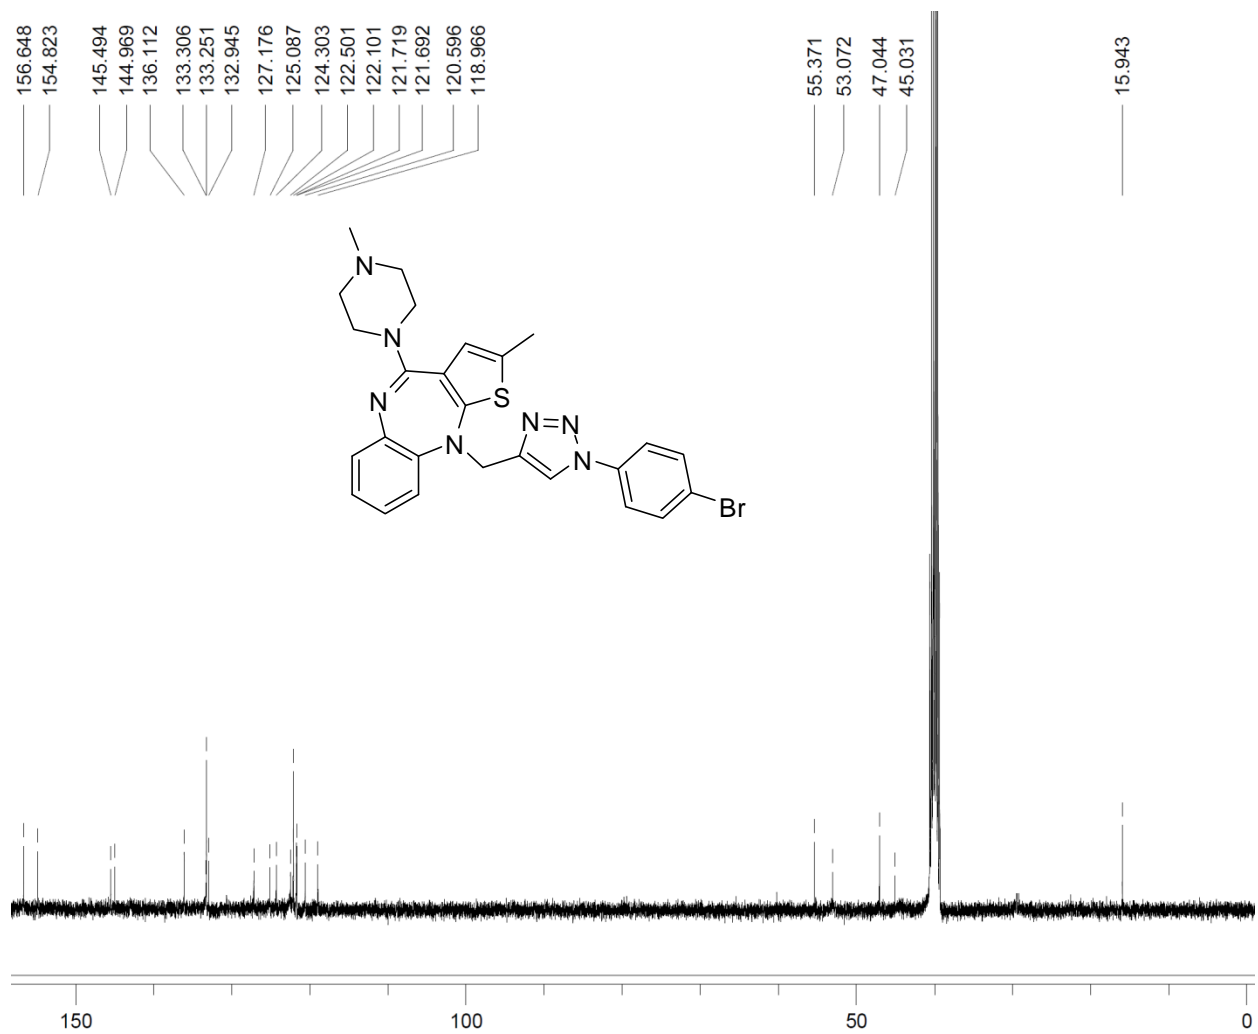

$^1\text{H}$  NMR of **31** (400 MHz,  $\text{CDCl}_3$ )

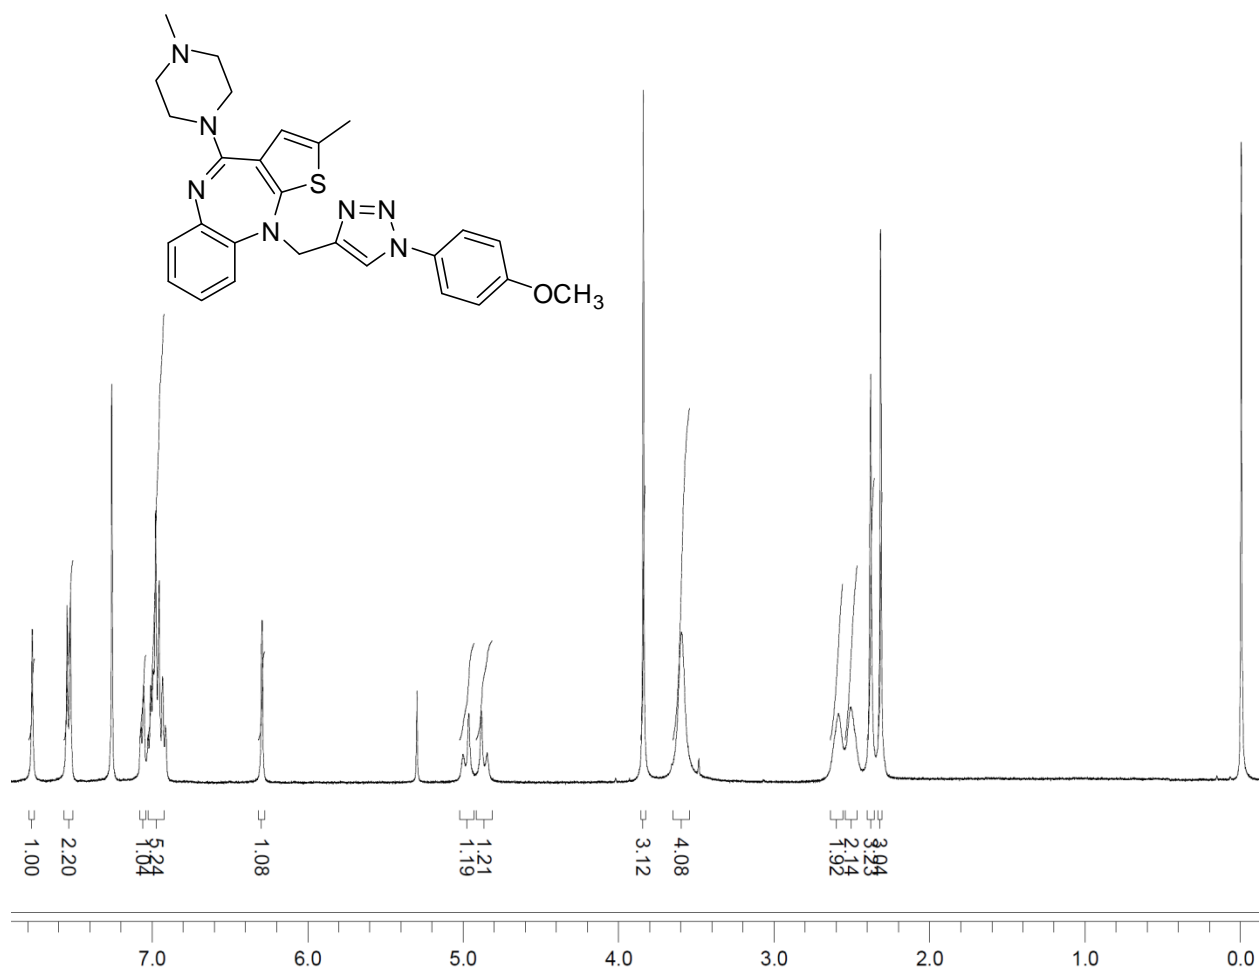

$^{13}\text{C}$  NMR of **31** (100 MHz,  $\text{CDCl}_3$ )

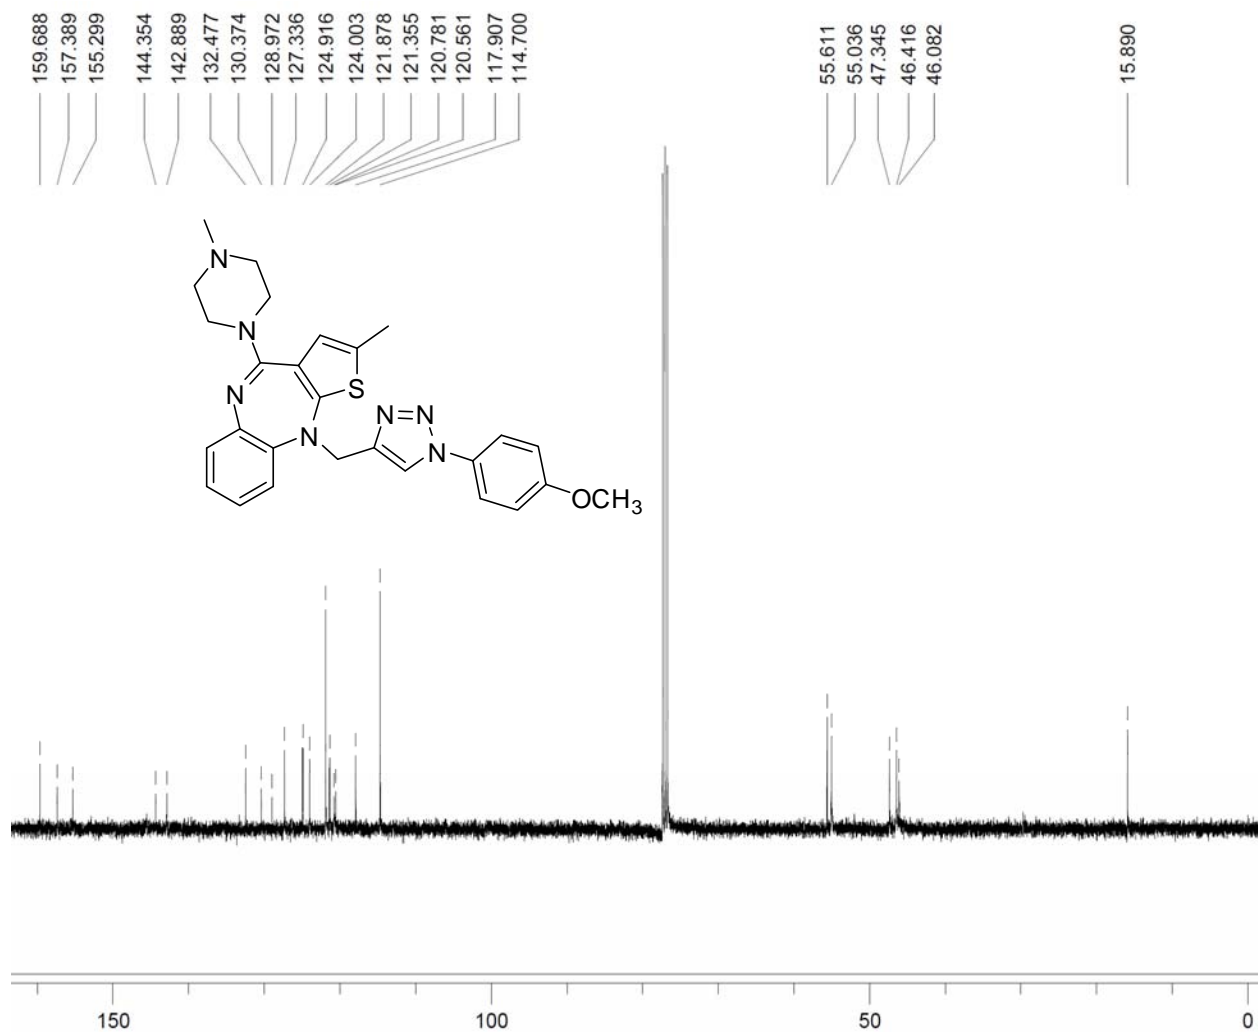



$^1\text{H}$  NMR of **3m** (400 MHz,  $\text{CDCl}_3$ )

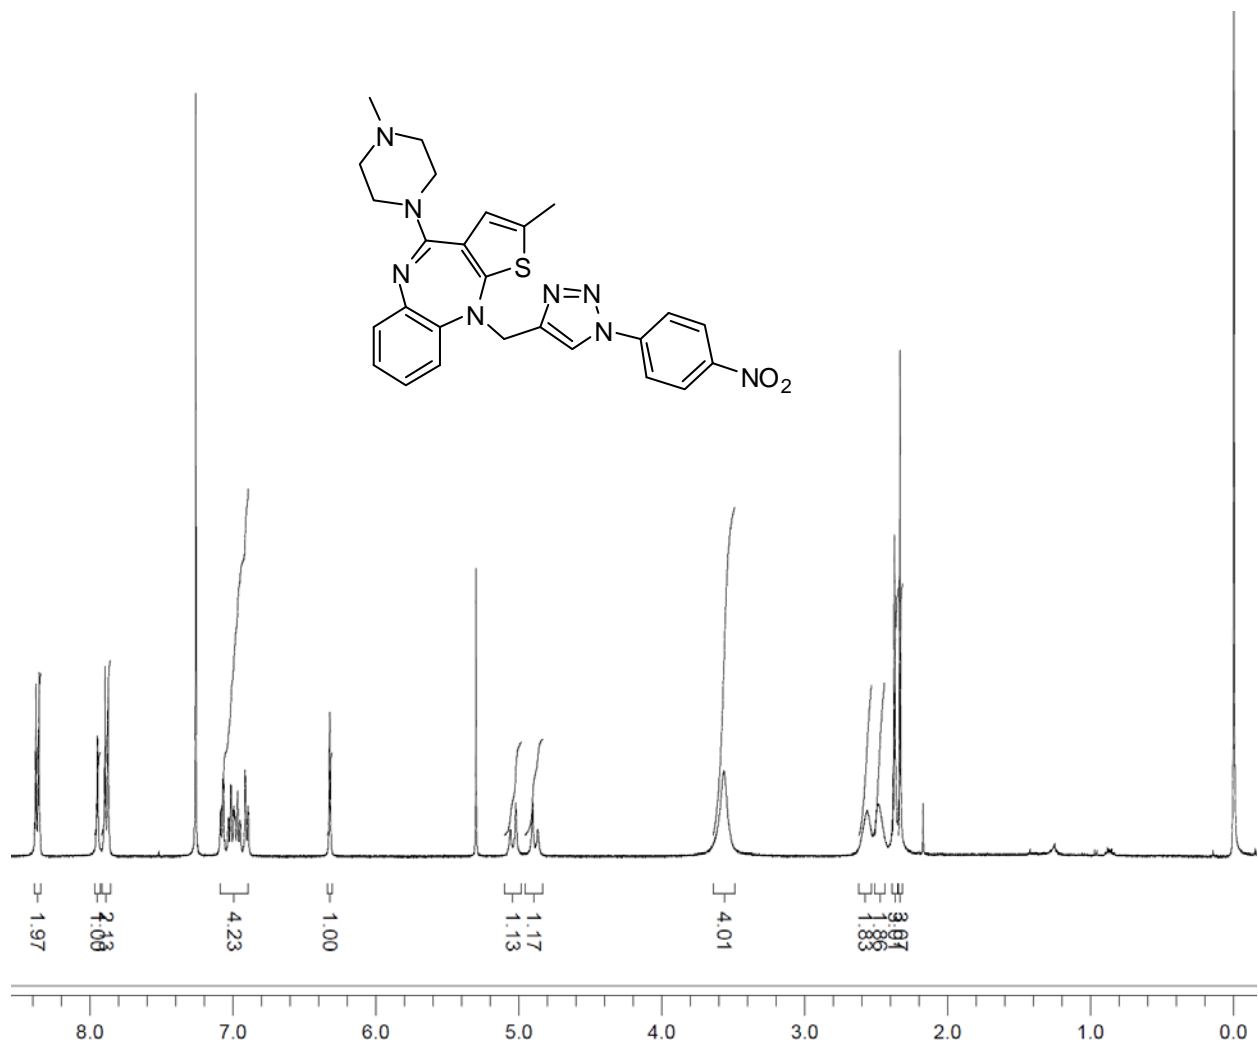

$^{13}\text{C}$  NMR of **3m** (100 MHz,  $\text{CDCl}_3$ )

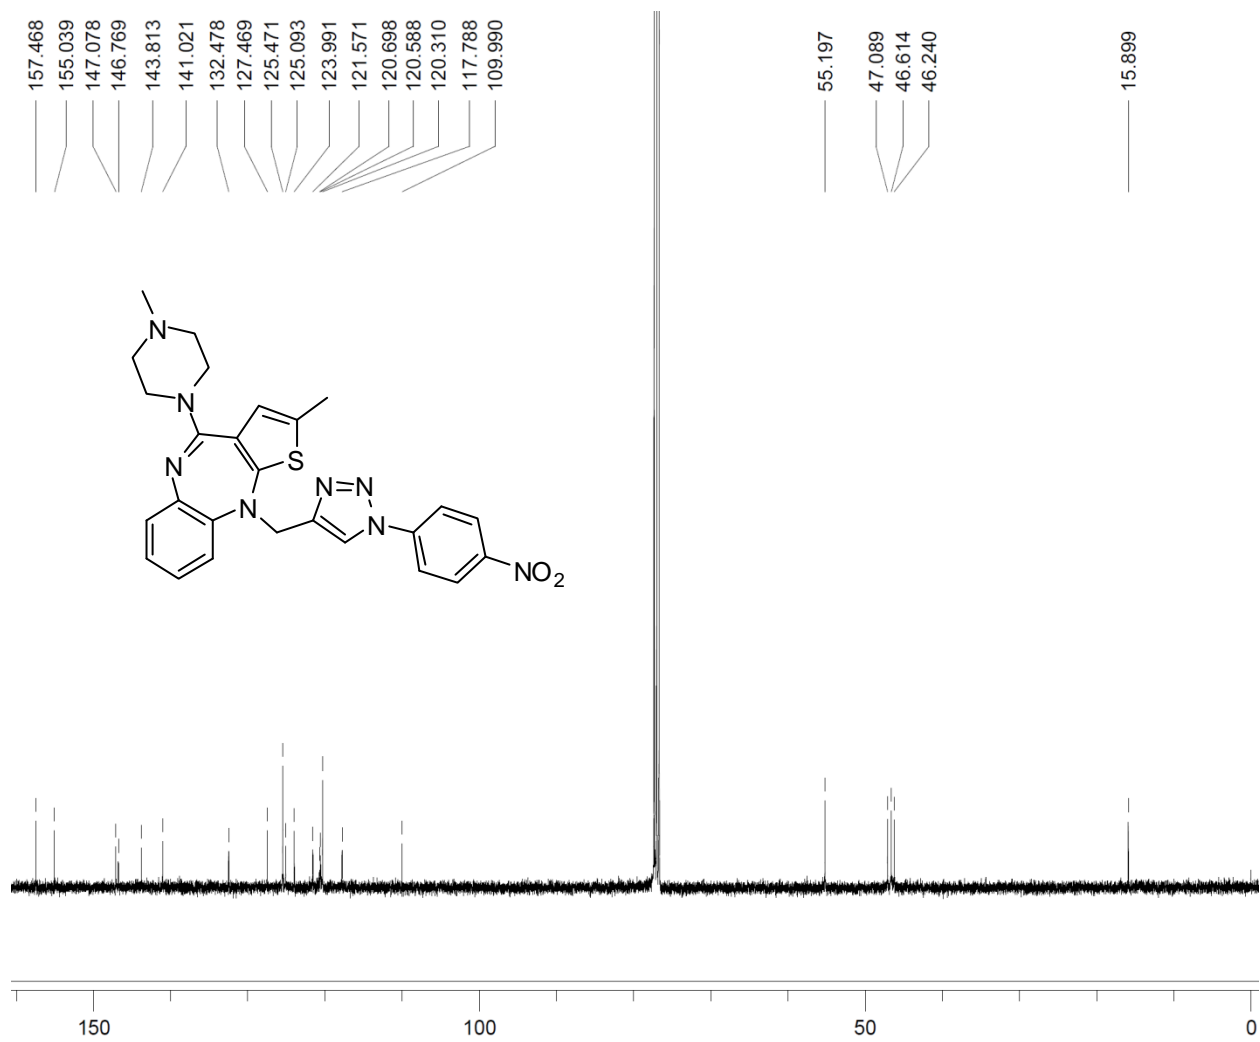

$^1\text{H}$  NMR of **3n** (400 MHz,  $\text{CDCl}_3$ )

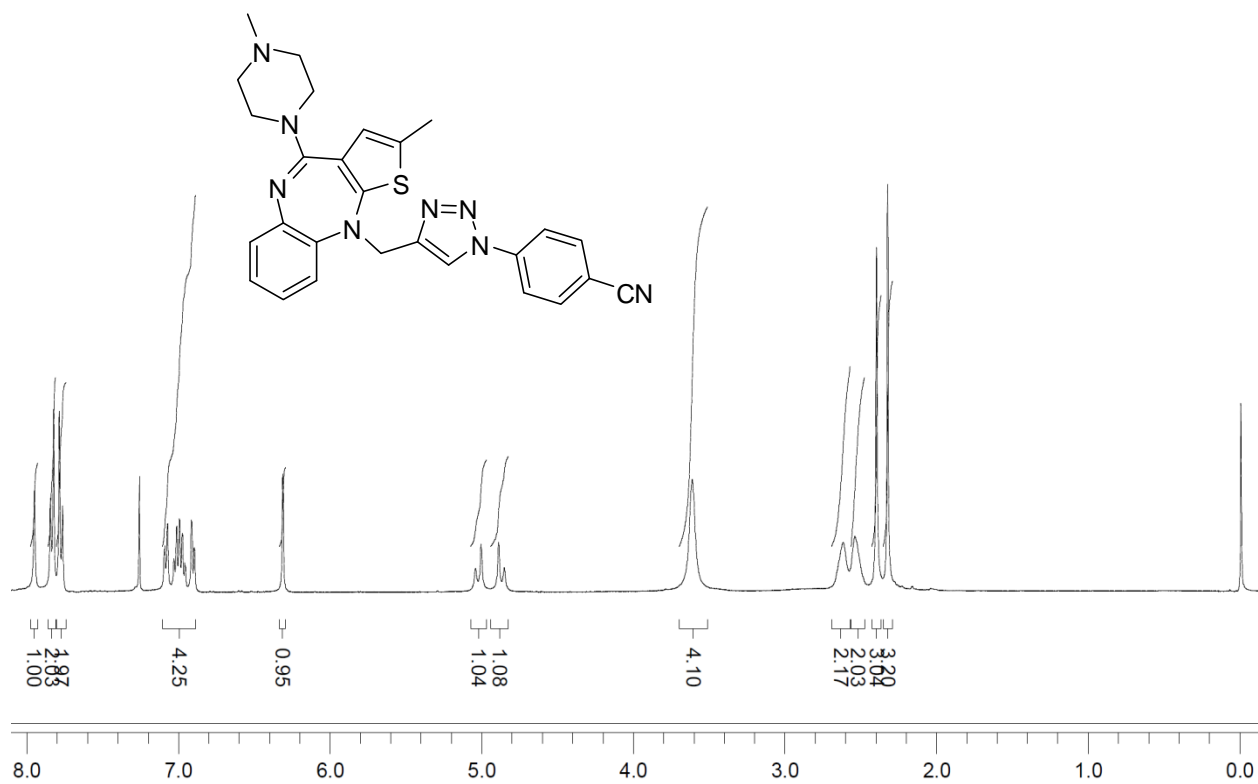

$^{13}\text{C}$  NMR of **3n** (100 MHz,  $\text{CDCl}_3$ )

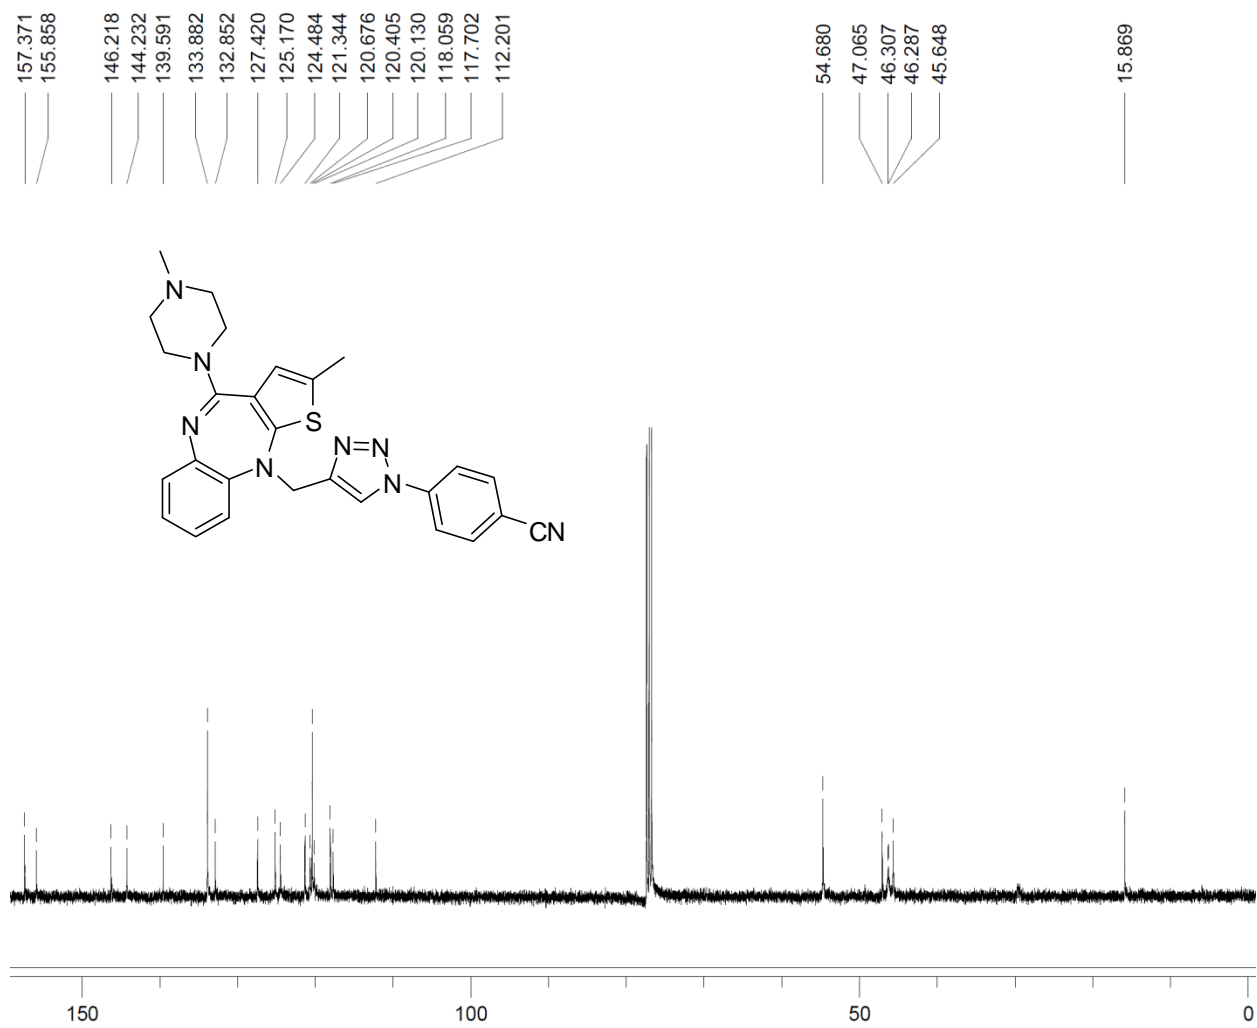

$^1\text{H}$  NMR of **3o** (400 MHz,  $\text{CDCl}_3$ )

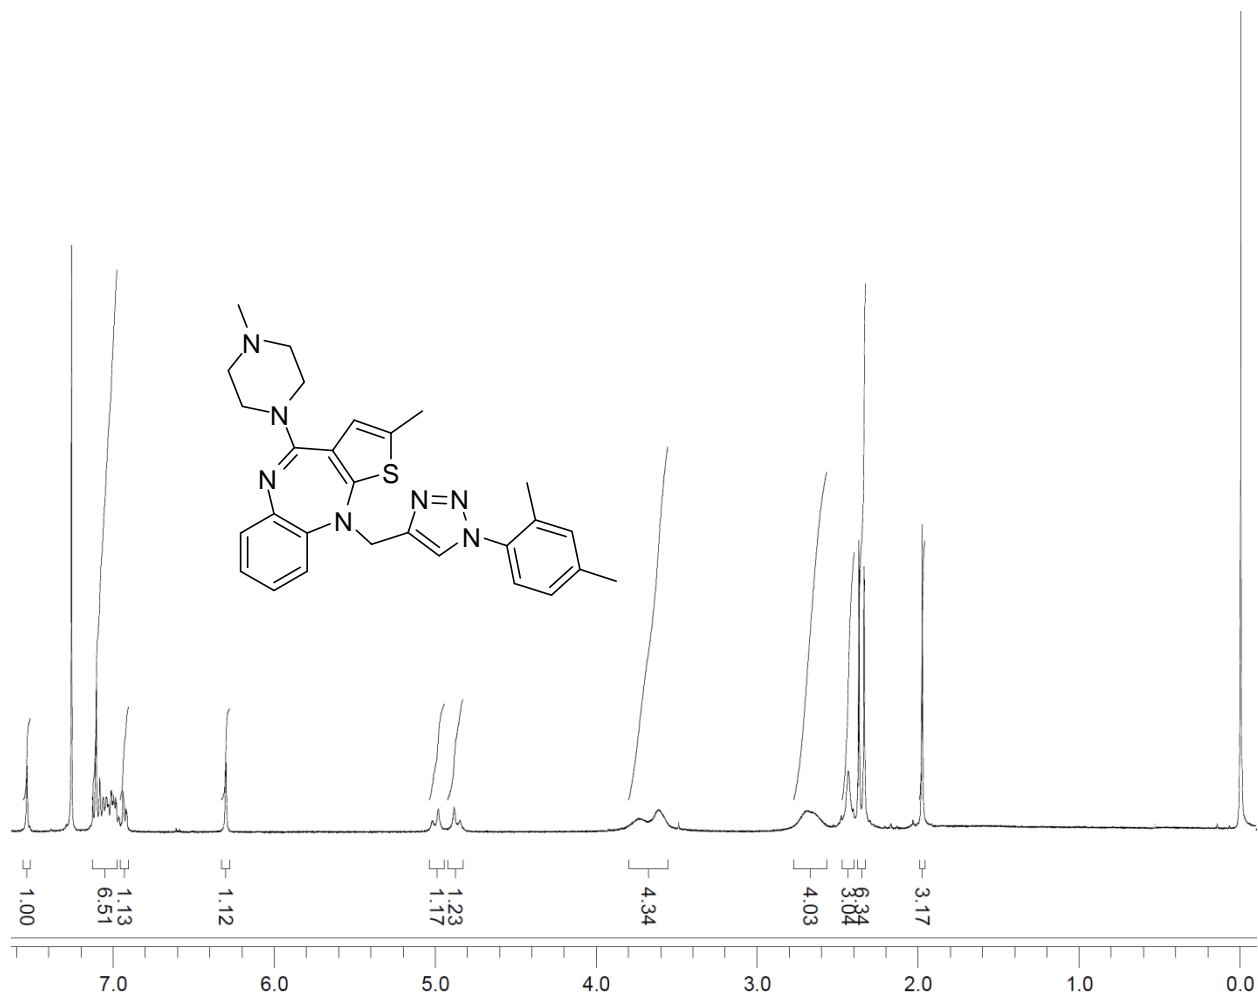

$^{13}\text{C}$  NMR of **3o** (100 MHz,  $\text{CDCl}_3$ )

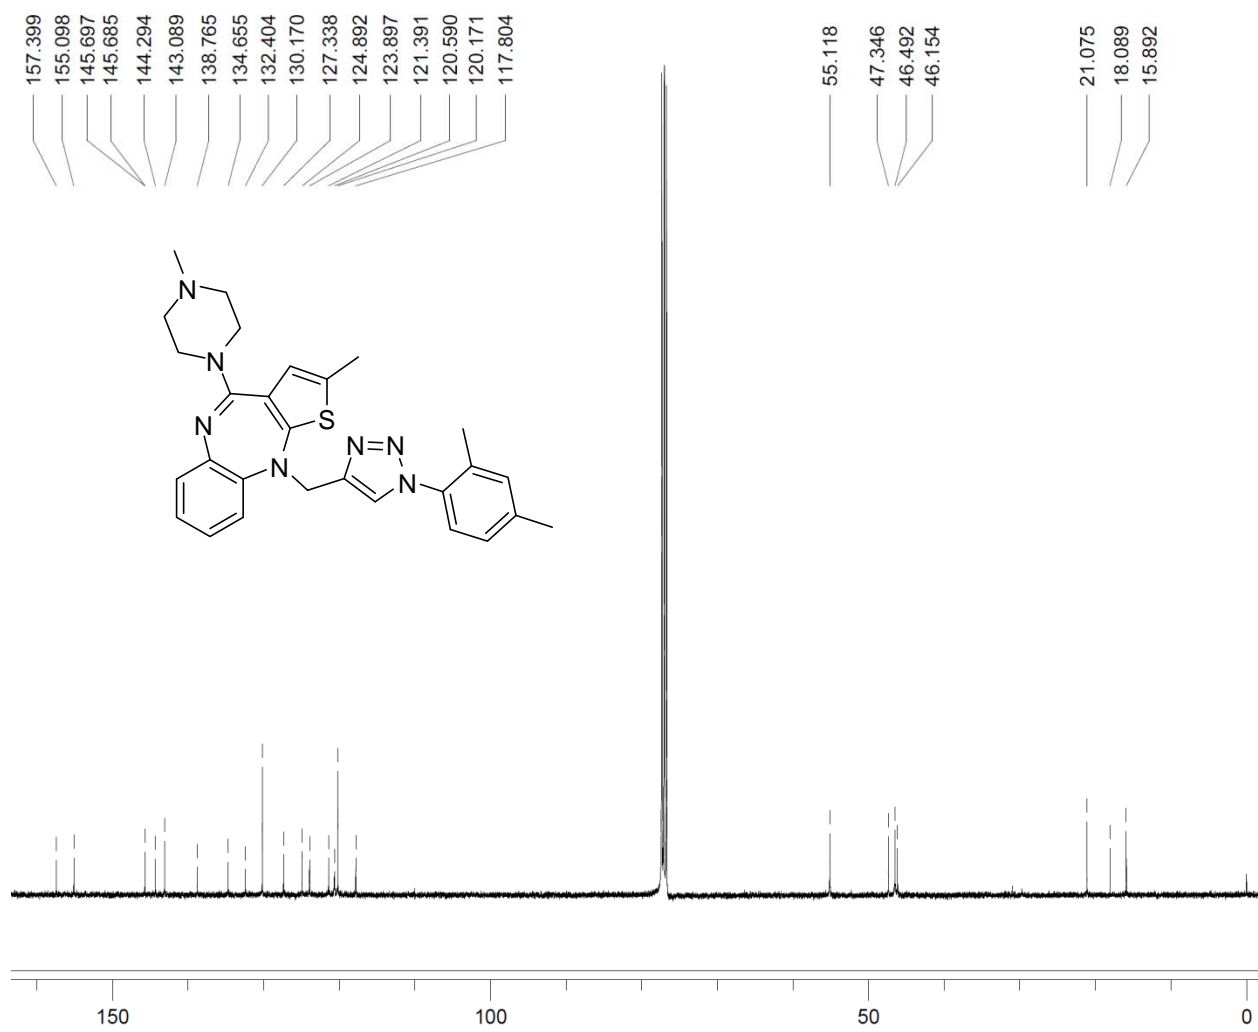

$^1\text{H}$  NMR of **3p** (400 MHz,  $\text{CDCl}_3$ )

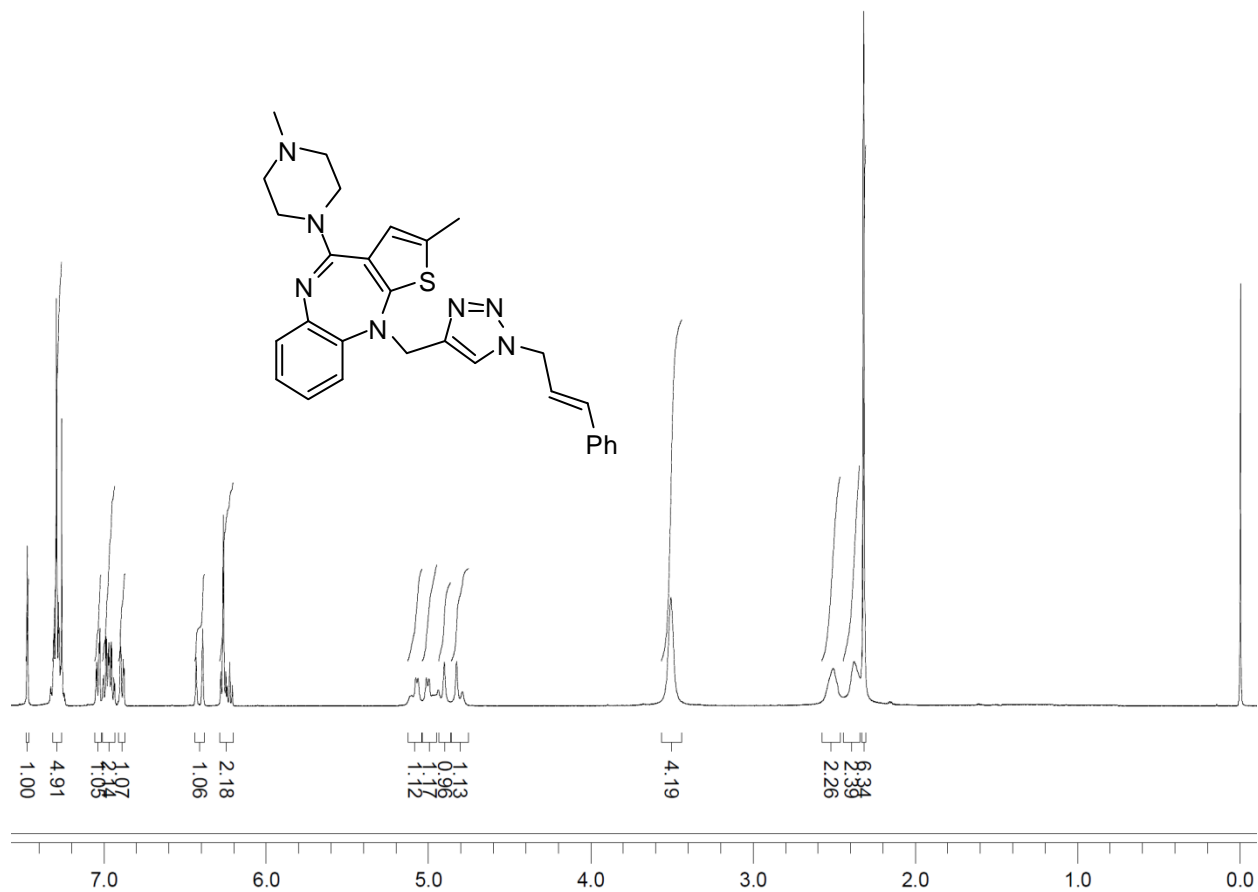

$^{13}\text{C}$  NMR of **3p** (100 MHz,  $\text{CDCl}_3$ )

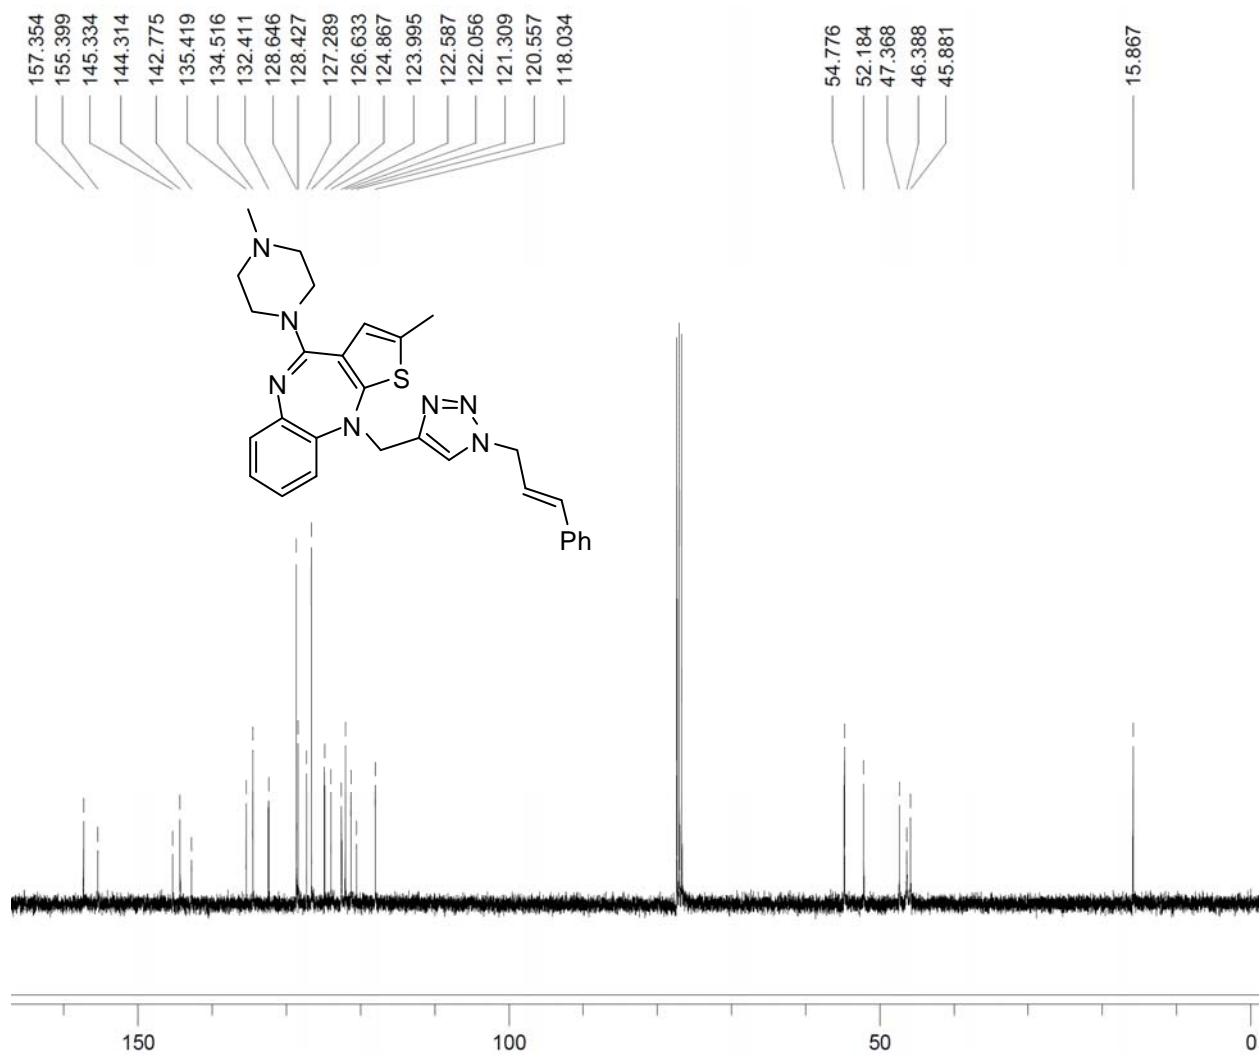



$^1\text{H}$  NMR of **3q** (400 MHz,  $\text{CDCl}_3$ )

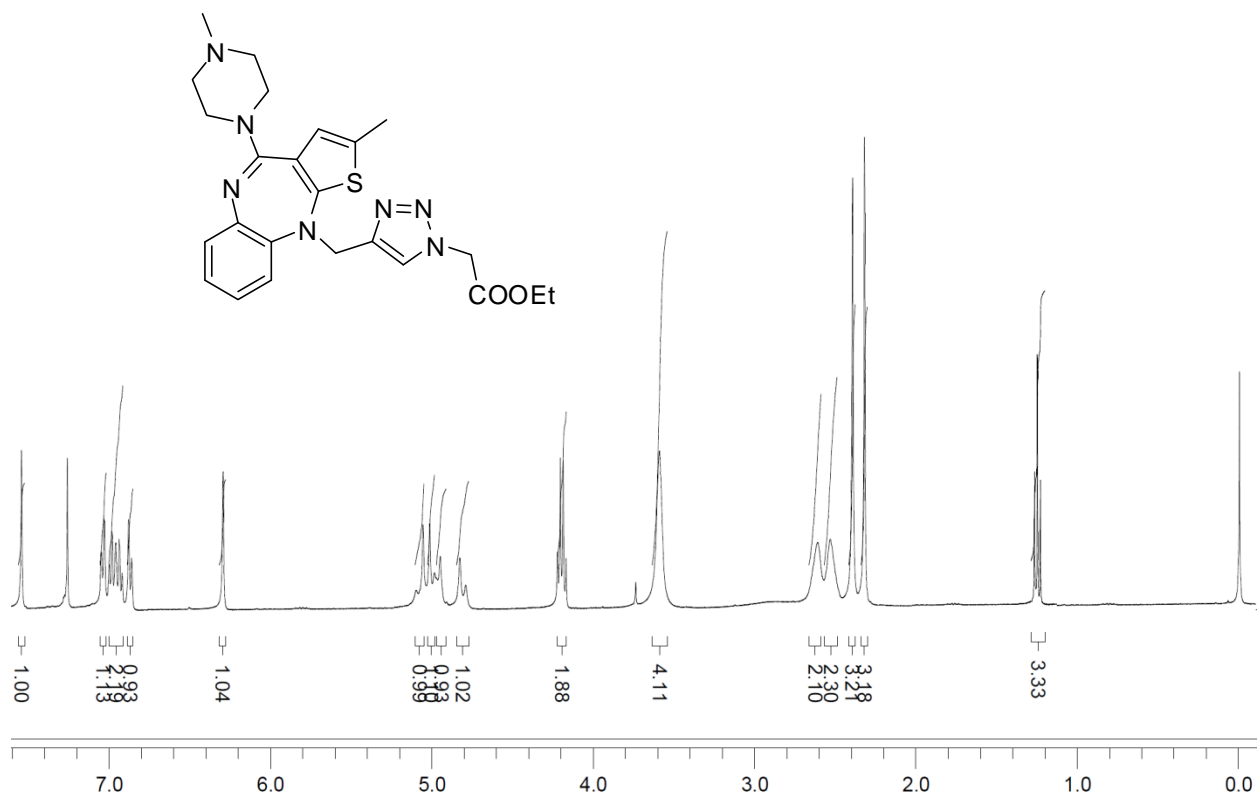

$^{13}\text{C}$  NMR of **3q** (100 MHz,  $\text{CDCl}_3$ )

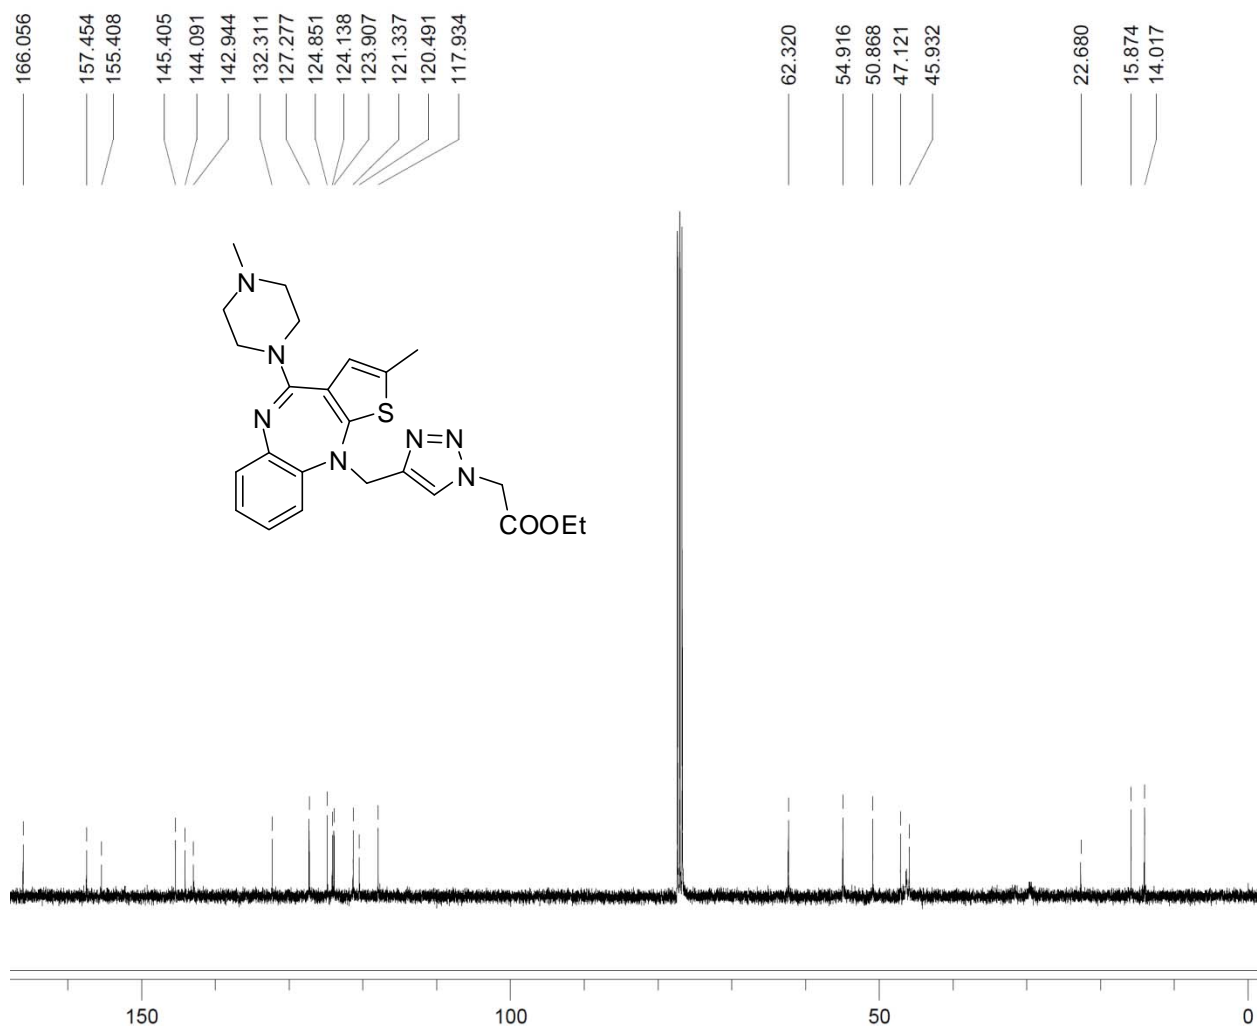

$^1\text{H}$  NMR of **3r** (400 MHz,  $\text{CDCl}_3$ )

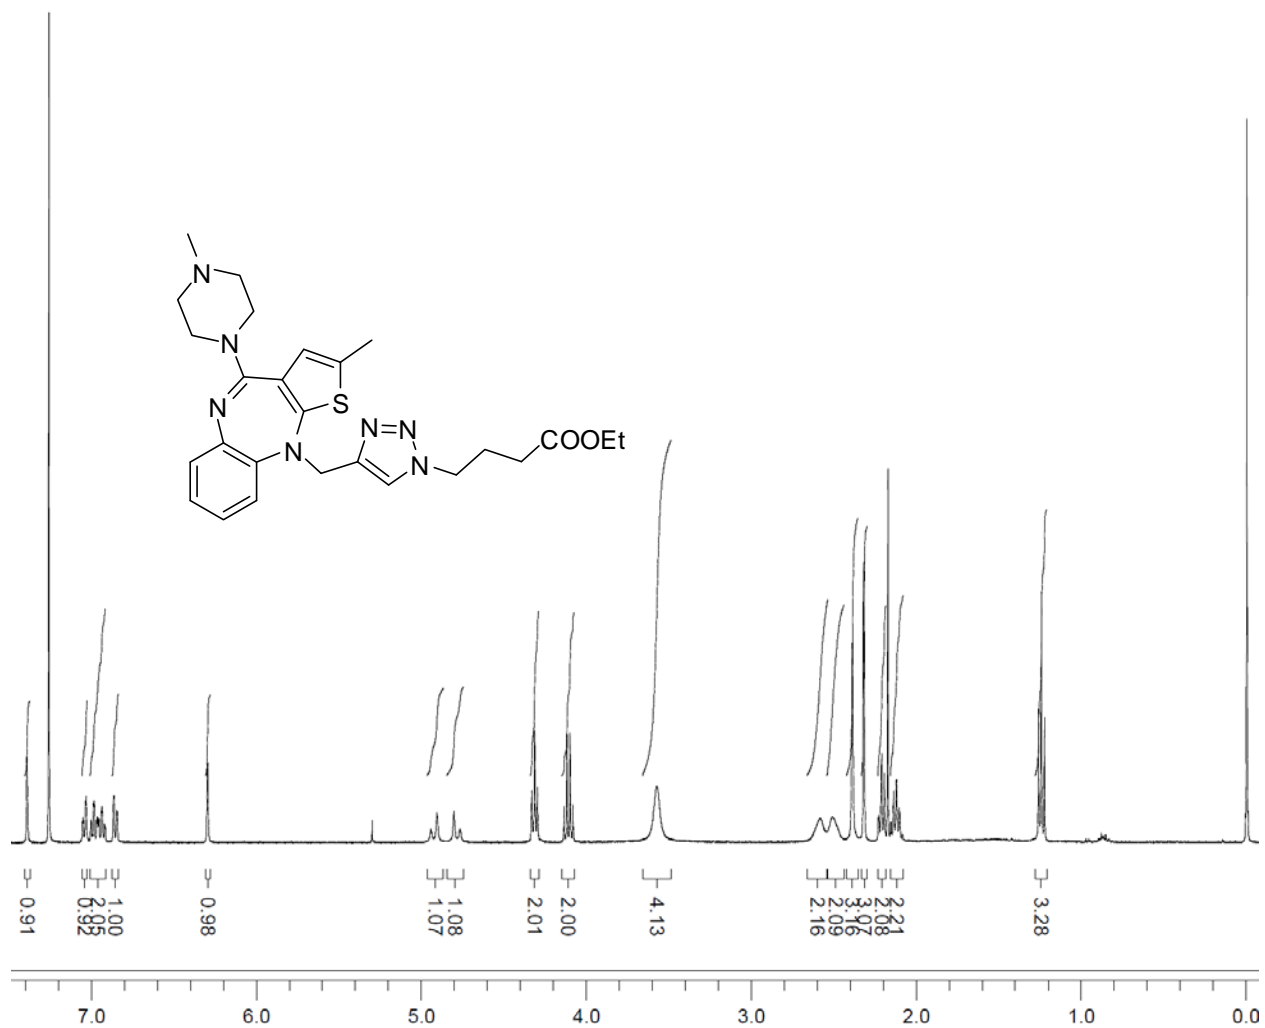

$^{13}\text{C}$  NMR of **3q** (100 MHz,  $\text{CDCl}_3$ )

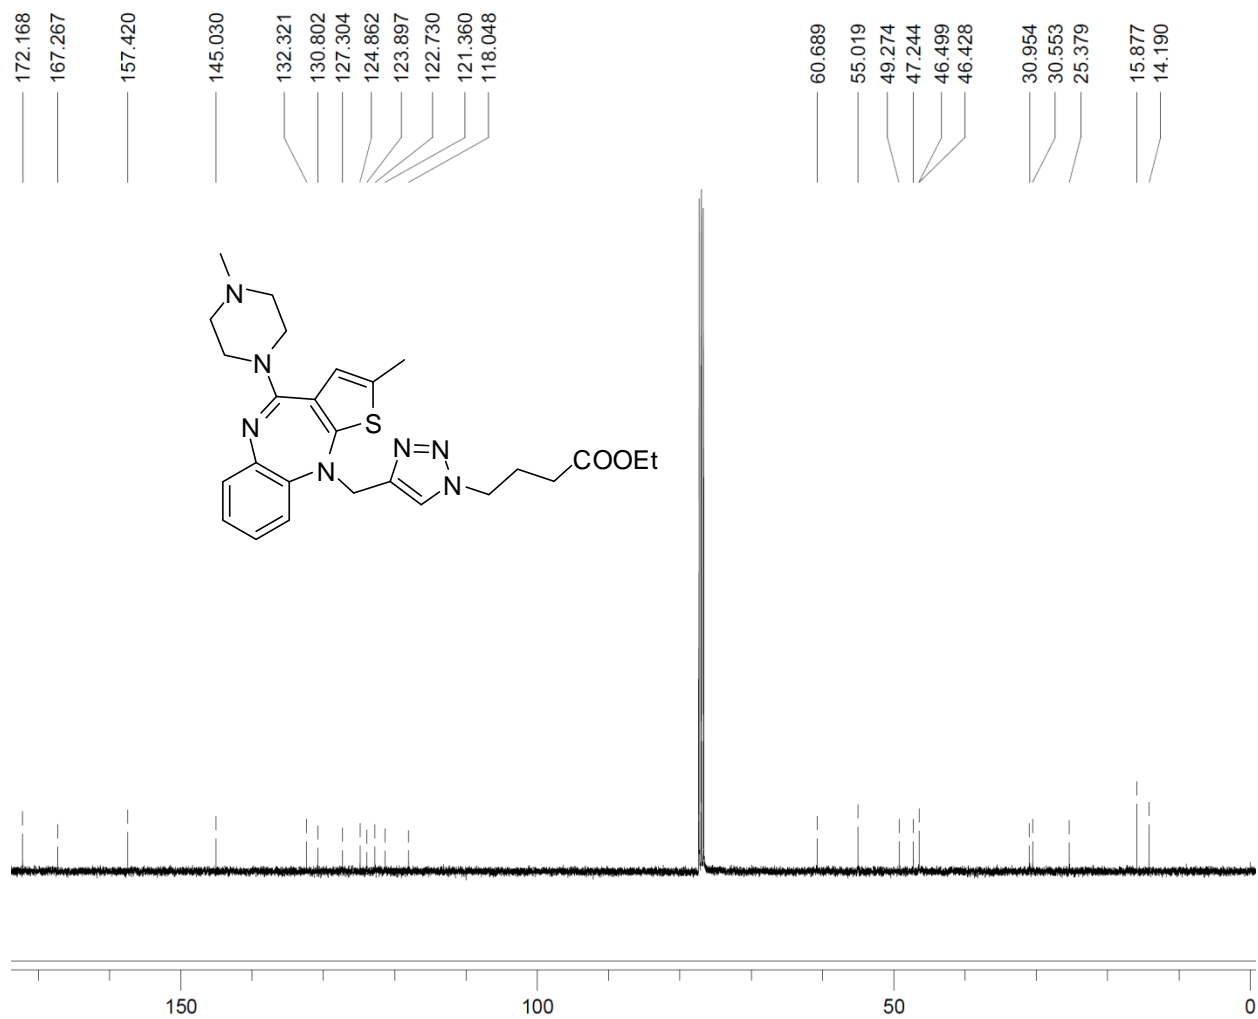

$^1\text{H}$  NMR of **2f** (400 MHz,  $\text{CDCl}_3$ )

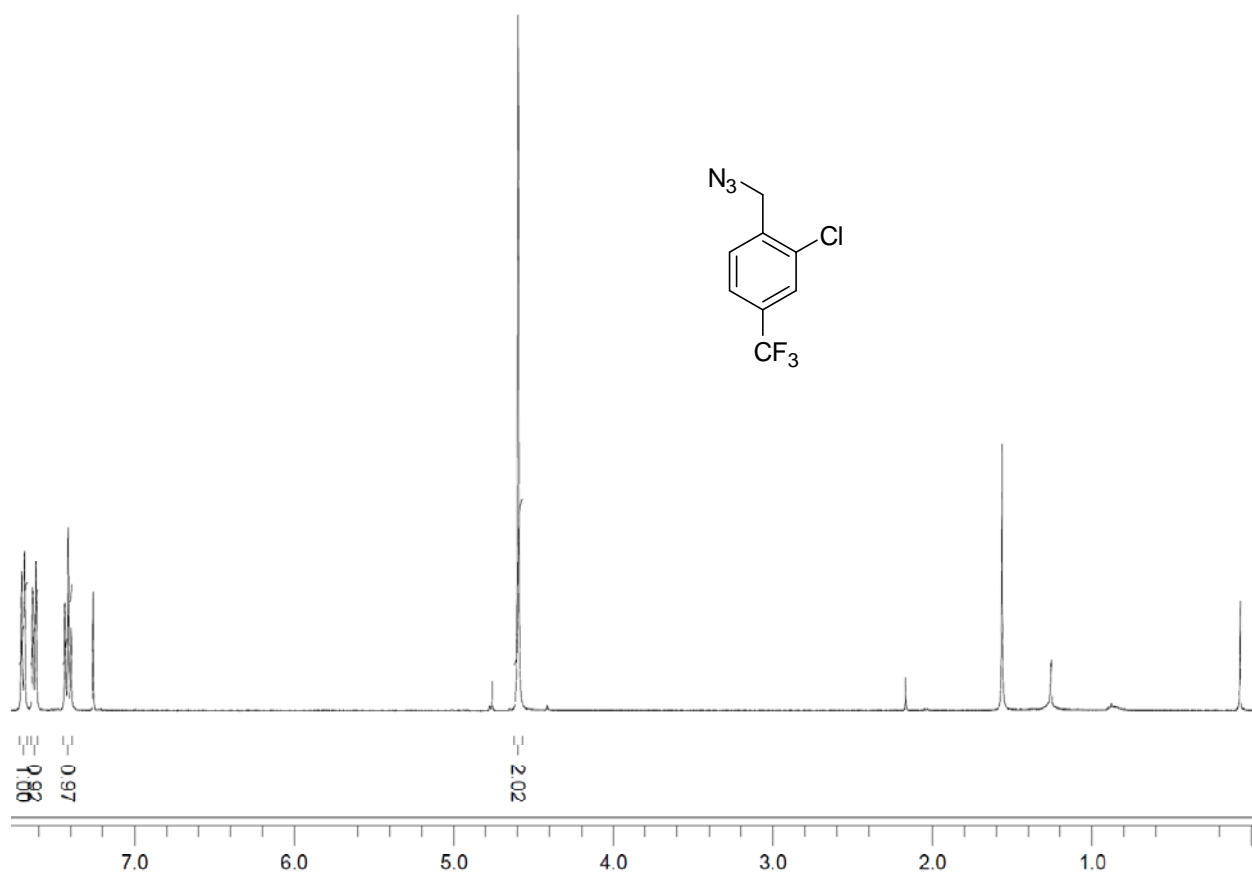

$^{13}\text{C}$  NMR of **2f** (100 MHz,  $\text{CDCl}_3$ )

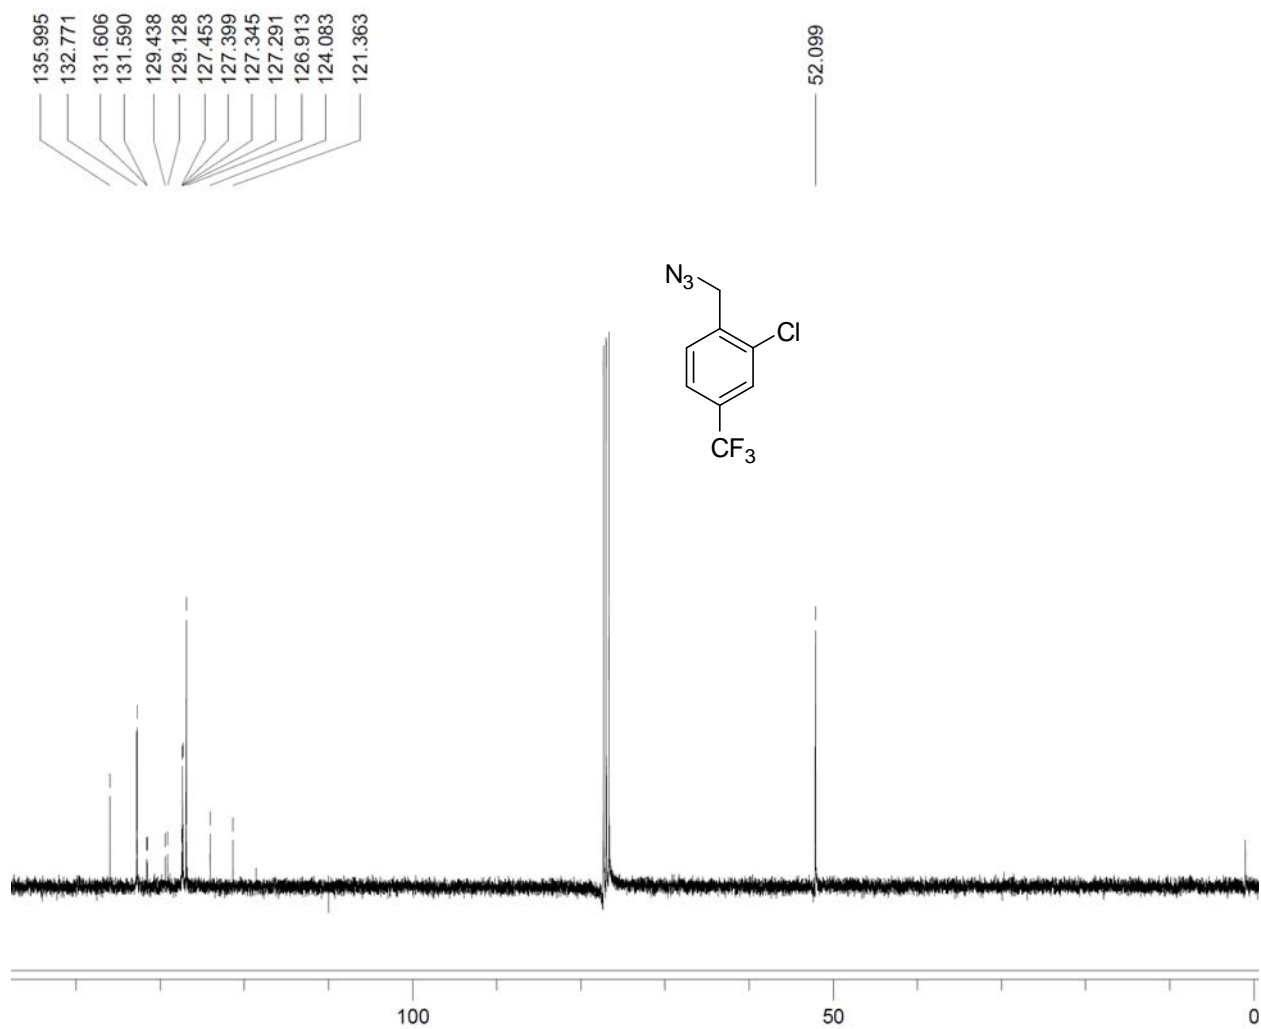

Supplement: c5ra20380e4.pdf [file c5ra20380e4.pdf]
