# Supplementary material for: 1,2,3-Triazoles derived from olanzapine: their synthesis via an ultrasound assisted CuAAC method and evaluation as inhibitors of PDE4B
Source: Royal Society of Chemistry journal article supplement (doi:10.1039/c5ra20380e), 2015-01-01
Supplement: c5ra20380e2.pdf [file c5ra20380e2.pdf]

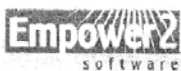

CPRI@DRILS

### SAMPLE INFORMATION

|                   |                           |                     |              |
|-------------------|---------------------------|---------------------|--------------|
| Sample Name:      | ILS/BYS/C106/1-30         | Sample Set Name:    | 190215       |
| A R Number:       | CM15B019                  | Acq. Method Set:    | IBT          |
| Vial:             | 4                         | Processing Method:  | IBT PRO      |
| Injection #:      | 1                         | Channel Name:       | 210.0nm      |
| Injection Volume: | 5.00 ul                   | Proc. Chnl. Descr.: | PDA 210.0 nm |
| Run Time:         | 25.0 Minutes              |                     |              |
| Date Acquired:    | 2/19/2015 11:19:05 AM IST |                     |              |
| Date Processed:   | 2/19/2015 12:59:55 PM IST |                     |              |

Column: Symmetry C-18 75\*4.6mm 3.5 µm  
Mobile phase: A) 0.1% TFA in water B) ACN  
T/%B: 0/10, 2/10, 10/95, 20/95, 22/10, 25/10  
Flow: 1.0 ml/min, Diluent: ACN: WATER (80:20)

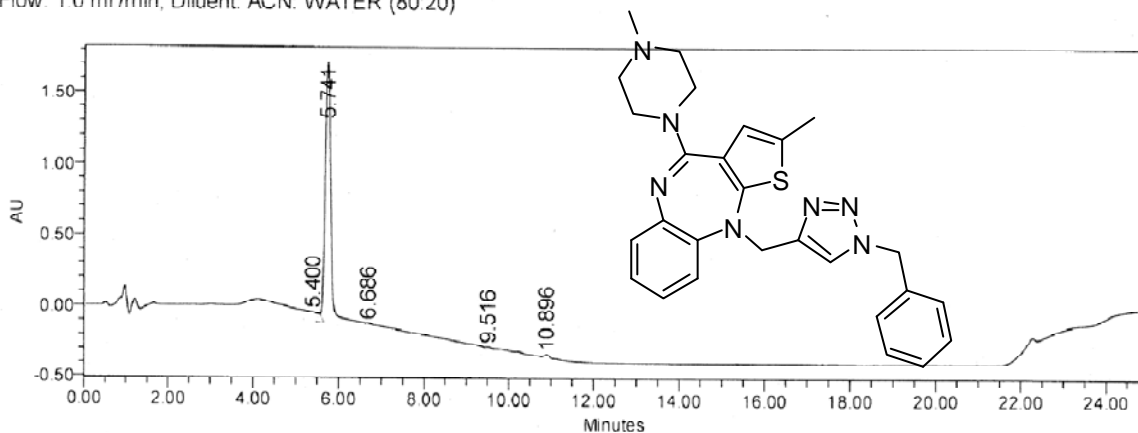

|   | RT     | Area     | % Area | Height  |
|---|--------|----------|--------|---------|
| 1 | 5.400  | 21559    | 0.14   | 2009    |
| 2 | 5.741  | 14796217 | 98.45  | 1795631 |
| 3 | 6.686  | 26932    | 0.18   | 3722    |
| 4 | 9.516  | 30774    | 0.20   | 4896    |
| 5 | 10.896 | 153281   | 1.02   | 22938   |

Analyzed By:

Checked By:

*Handwritten signature and date: 19/2/15*

**SAMPLE INFORMATION**

|                   |                          |                     |                               |
|-------------------|--------------------------|---------------------|-------------------------------|
| Sample Name:      | ILS-SBN-T-8              | Sample Set Name:    | 290515_1                      |
| Sample Type:      | CM15E040                 | Acq. Method Set:    | MC                            |
| Vial:             | 37                       | Processing Method:  | MC_PRO                        |
| Injection #:      | 1                        | Channel Name:       | 210.0nm                       |
| Injection Volume: | 10.00 ul                 | Proc. Chnl. Descr.: | PDA 210.0 nm Blank Subtracted |
| Run Time:         | 12.0 Minutes             |                     |                               |
| Date Acquired:    | 5/29/2015 1:05:38 PM IST |                     |                               |
| Date Processed:   | 5/29/2015 2:38:13 PM IST |                     |                               |

Column: X Bridge C18 150\*4.6mm 5µm  
 Mobile phase: A) 0.1% TFA in water B) ACN  
 T1%B: 0/20, 0.5/20, 2/95, 8/95, 10/20, 12/20  
 Flow: 1.0 ml /min, Diluent: ACN: WATER (90:10)

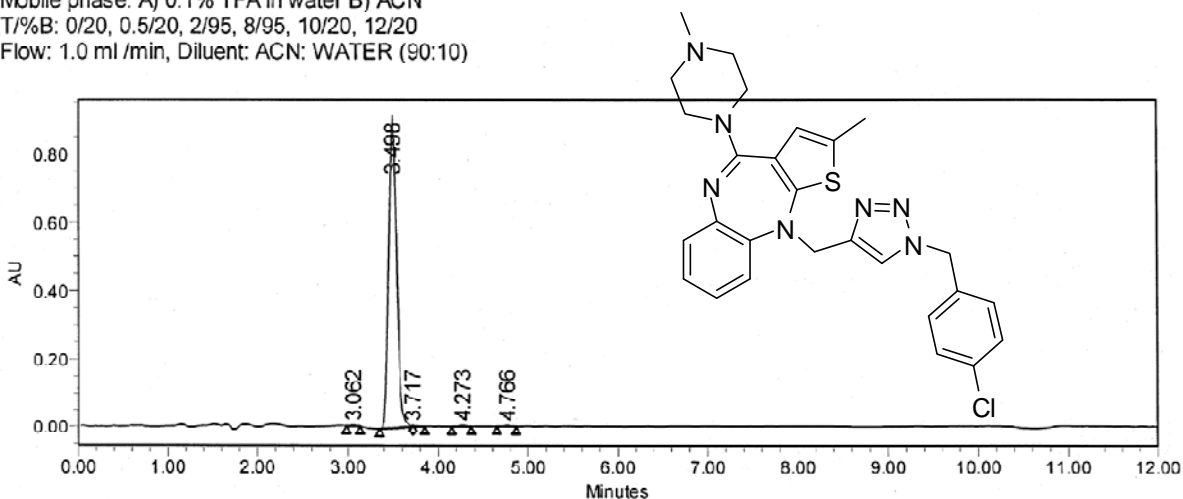

|   | RT    | Area    | % Area | Height |
|---|-------|---------|--------|--------|
| 1 | 3.062 | 12186   | 0.21   | 2207   |
| 2 | 3.498 | 5747929 | 98.75  | 911512 |
| 3 | 3.717 | 19124   | 0.33   | 3783   |
| 4 | 4.273 | 24459   | 0.42   | 3688   |
| 5 | 4.766 | 17086   | 0.29   | 2673   |

Analyzed By:

Checked By:

SAMPLE INFORMATION

|                   |                           |                     |                               |
|-------------------|---------------------------|---------------------|-------------------------------|
| Sample Name:      | ILS-SBN-T-1               | Sample Set Name:    | 140515                        |
| Sample Type:      | CM15E020                  | Acq. Method Set:    | MC                            |
| Vial:             | 5                         | Processing Method:  | MC PRO                        |
| Injection #:      | 1                         | Channel Name:       | 230.0nm                       |
| Injection Volume: | 12.00 ul                  | Proc. Chnl. Descr.: | PDA 230.0 nm Blank Subtracted |
| Run Time:         | 12.0 Minutes              |                     |                               |
| Date Acquired:    | 5/14/2015 12:56:39 PM IST |                     |                               |
| Date Processed:   | 5/14/2015 3:44:07 PM IST  |                     |                               |

Column: Symmetry C-18 75\*4.6mm 3.5µm  
 Mobile phase: A) 0.1% TFA in water B) ACN  
 T/%B: 0/20, 0.5/20, 2/95, 8/95, 10/20, 12/20  
 Flow: 1.0 ml/min, Diluent: ACN: WATER (90:10)

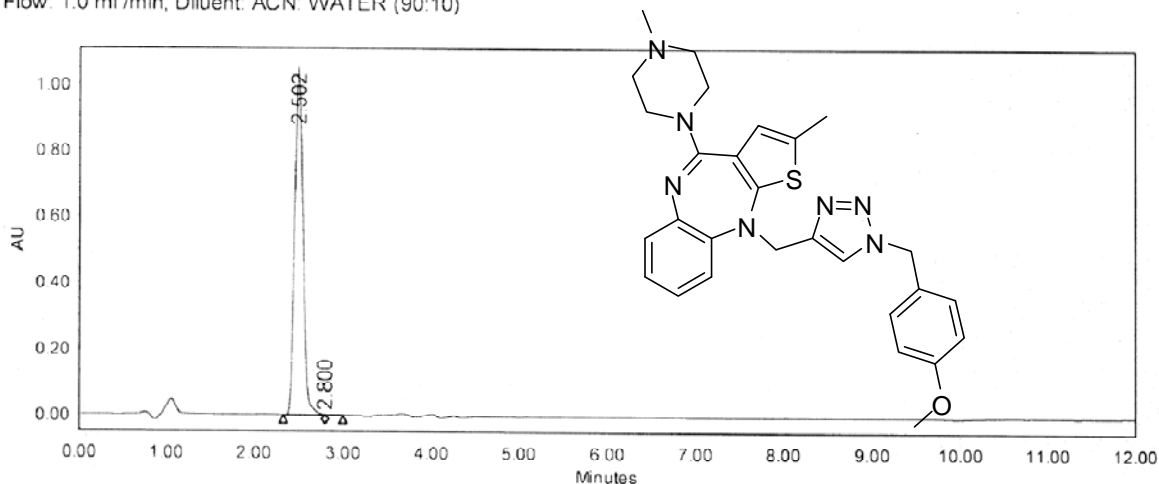

|   | RT    | Area    | % Area | Height  |
|---|-------|---------|--------|---------|
| 1 | 2.502 | 6846550 | 99.80  | 1049189 |
| 2 | 2.800 | 13409   | 0.20   | 2051    |

Analyzed By:

Checked By:

*Def Jaiswal*

**SAMPLE INFORMATION**

|                   |                          |                     |                               |
|-------------------|--------------------------|---------------------|-------------------------------|
| Sample Name:      | ILS-SBN-T-6              | Sample Set Name:    | 290515_1                      |
| Sample Type:      | CM15E042                 | Acq. Method Set:    | MC                            |
| Vial:             | 35                       | Processing Method:  | MC_PRO                        |
| Injection #:      | 1                        | Channel Name:       | 210.0nm                       |
| Injection Volume: | 10.00 ul                 | Proc. Chnl. Descr.: | PDA 210.0 nm Blank Subtracted |
| Run Time:         | 12.0 Minutes             |                     |                               |
| Date Acquired:    | 5/29/2015 1:59:17 PM IST |                     |                               |
| Date Processed:   | 5/29/2015 2:36:26 PM IST |                     |                               |

Column: X Bridge C18 150\*4.6mm 5µm  
 Mobile phase: A) 0.1% TFA in water B) ACN  
 T/%B: 0/20, 0.5/20, 2/95, 8/95, 10/20, 12/20  
 Flow: 1.0 ml /min, Diluent: ACN: WATER (90:10)

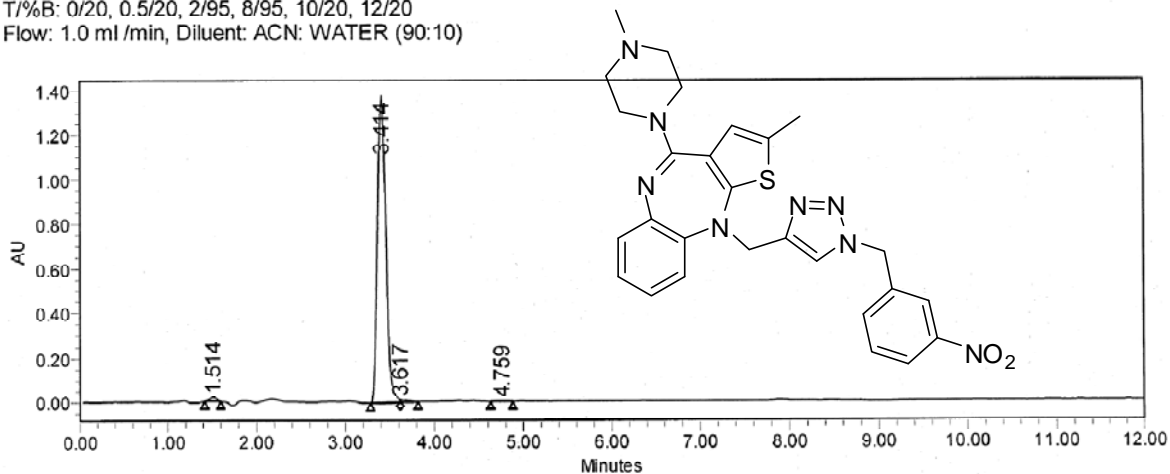

|   | RT    | Area    | % Area | Height  |
|---|-------|---------|--------|---------|
| 1 | 1.514 | 100360  | 1.10   | 16433   |
| 2 | 3.414 | 8914616 | 97.86  | 1373002 |
| 3 | 3.617 | 70804   | 0.78   | 11690   |
| 4 | 4.759 | 23702   | 0.26   | 3192    |

Analyzed By: *M. S. 5/29/15*

Checked By:

**SAMPLE INFORMATION**

|                   |                          |                     |                               |
|-------------------|--------------------------|---------------------|-------------------------------|
| Sample Name:      | ILS-BYS-C106-1-53        | Sample Set Name:    | 290515_1                      |
| Sample Type:      | CM15E04                  | Acq. Method Set:    | MC                            |
| Vial:             | 39                       | Processing Method:  | MC_PRO                        |
| Injection #:      | 1                        | Channel Name:       | 210.0nm                       |
| Injection Volume: | 10.00 ul                 | Proc. Chnl. Descr.: | PDA 210.0 nm Blank Subtracted |
| Run Time:         | 12.0 Minutes             |                     |                               |
| Date Acquired:    | 5/29/2015 1:41:15 PM IST |                     |                               |
| Date Processed:   | 5/29/2015 2:37:25 PM IST |                     |                               |

Column: X Bridge C18 150\*4.6mm 5µm  
 Mobile phase: A) 0.1% TFA in water B) ACN  
 T/%B: 0/20, 0.5/20, 2/95, 8/95, 10/20, 12/20  
 Flow: 1.0 ml/min, Diluent: ACN: WATER (90:10)

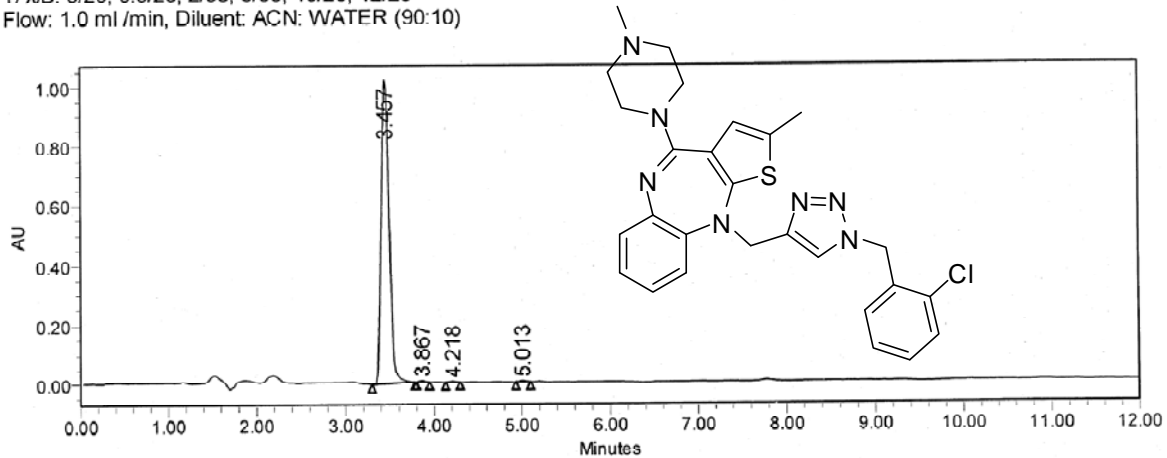

|   | RT    | Area    | % Area | Height  |
|---|-------|---------|--------|---------|
| 1 | 3.457 | 6354665 | 99.00  | 1013992 |
| 2 | 3.867 | 21967   | 0.34   | 4437    |
| 3 | 4.218 | 17850   | 0.28   | 3154    |
| 4 | 5.013 | 24228   | 0.38   | 4451    |

Analyzed By: *[Signature]*

Checked By:

SAMPLE INFORMATION

|                   |                           |                     |                               |
|-------------------|---------------------------|---------------------|-------------------------------|
| Sample Name:      | ILS-SBN-T-3               | Sample Set Name:    | 140515                        |
| Sample Type:      | CM15E021                  | Acq. Method Set:    | MC                            |
| Vial:             | 3                         | Processing Method:  | MC PRO                        |
| Injection #:      | 1                         | Channel Name:       | 200.0nm                       |
| Injection Volume: | 5.00 ul                   | Proc. Chnl. Descr.: | PDA 200.0 nm Blank Subtracted |
| Run Time:         | 12.0 Minutes              |                     |                               |
| Date Acquired:    | 5/14/2015 12:20:00 PM IST |                     |                               |
| Date Processed:   | 5/14/2015 3:41:16 PM IST  |                     |                               |

Column: Symmetry C-18 75\*4.6mm 3.5µm  
 Mobile phase: A) 0.1% TFA in water B) ACN  
 T/%B: 0/20, 0.5/20, 2/95, 8/95, 10/20, 12/20  
 Flow: 1.0 ml/min, Diluent: ACN: WATER (90:10)

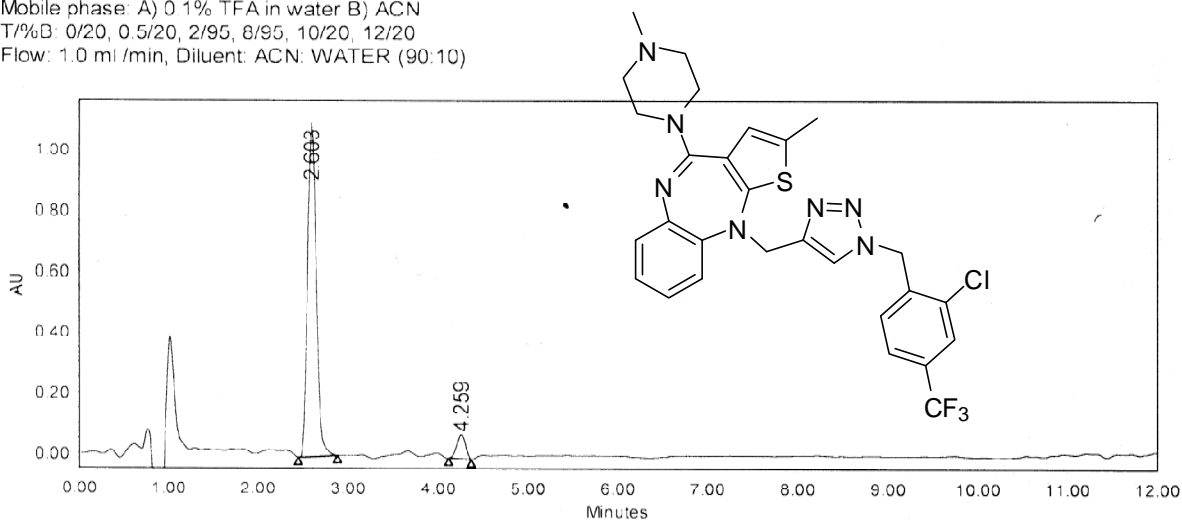

|   | RT    | Area    | % Area | Height  |
|---|-------|---------|--------|---------|
| 1 | 2.603 | 7340991 | 98.36  | 1091056 |
| 2 | 4.259 | 522135  | 2.64   | 78607   |

Analyzed By:

Checked By:

*Signature*

**SAMPLE INFORMATION**

|                   |                          |                     |                               |
|-------------------|--------------------------|---------------------|-------------------------------|
| Sample Name:      | ILS-SBN-T-7              | Sample Set Name:    | 290515_1                      |
| Sample Type:      | CM15E041                 | Acq. Method Set:    | MC                            |
| Vial:             | 36                       | Processing Method:  | MC_PRO                        |
| Injection #:      | 1                        | Channel Name:       | 210.0nm                       |
| Injection Volume: | 10.00 ul                 | Proc. Chnl. Descr.: | PDA 210.0 nm Blank Subtracted |
| Run Time:         | 12.0 Minutes             |                     |                               |
| Date Acquired:    | 5/29/2015 2:17:03 PM IST |                     |                               |
| Date Processed:   | 5/29/2015 2:35:14 PM IST |                     |                               |

Column: X Bridge C18 150\*4.6mm 5µm  
 Mobile phase: A) 0.1% TFA in water B) ACN  
 T/%B: 0/20, 0.5/20, 2/95, 8/95, 10/20, 12/20  
 Flow: 1.0 ml /min, Diluent: ACN: WATER (90:10)

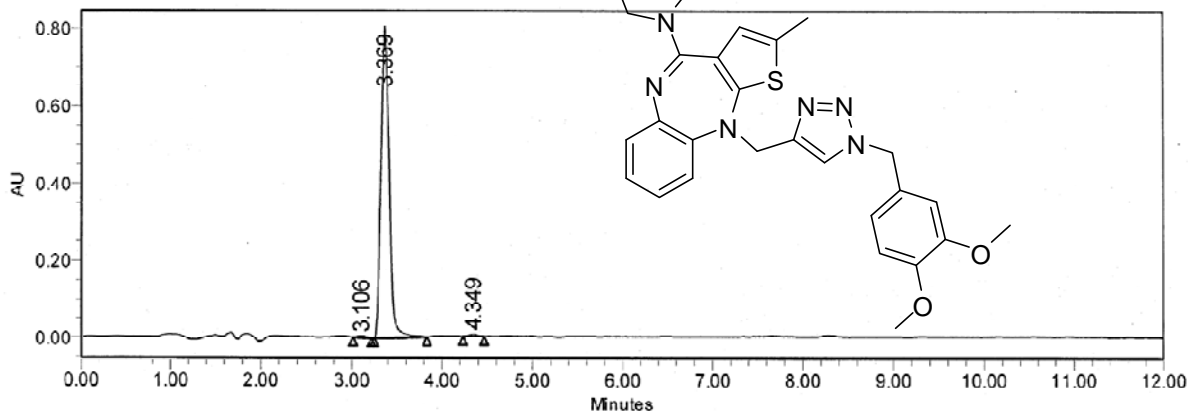

|   | RT    | Area    | % Area | Height |
|---|-------|---------|--------|--------|
| 1 | 3.106 | 26427   | 0.52   | 4023   |
| 2 | 3.369 | 5037237 | 98.64  | 792412 |
| 3 | 4.349 | 42827   | 0.84   | 6602   |

*M. S. / 15/15*  
 Analyzed By:

Checked By:

**SAMPLE INFORMATION**

|                   |                          |                     |              |
|-------------------|--------------------------|---------------------|--------------|
| Sample Name:      | ILS/BYS/C106/1-38        | Sample Set Name:    | 120315_1     |
| A R Number:       | CM15C010                 | Acq. Method Set:    | ERB_L1       |
| Vial:             | 13                       | Processing Method:  | LCZ_PRO      |
| Injection #:      | 1                        | Channel Name:       | 240.0nm      |
| Injection Volume: | 5.00 ul                  | Proc. Chnl. Descr.: | PDA 240.0 nm |
| Run Time:         | 25.0 Minutes             |                     |              |
| Date Acquired:    | 3/12/2015 3:24:23 PM IST |                     |              |
| Date Processed:   | 3/12/2015 6:16:12 PM IST |                     |              |

Column: Symmetry C-18 75\*4.6mm 3.5µm  
 Mobile phase: A) 0.1% TFA in water B) ACN  
 T/%B: 0/20, 3/20, 8/40, 15/95, 20/95, 25/20, 30/20  
 Flow: 1.0 ml/min, Diluent: ACN

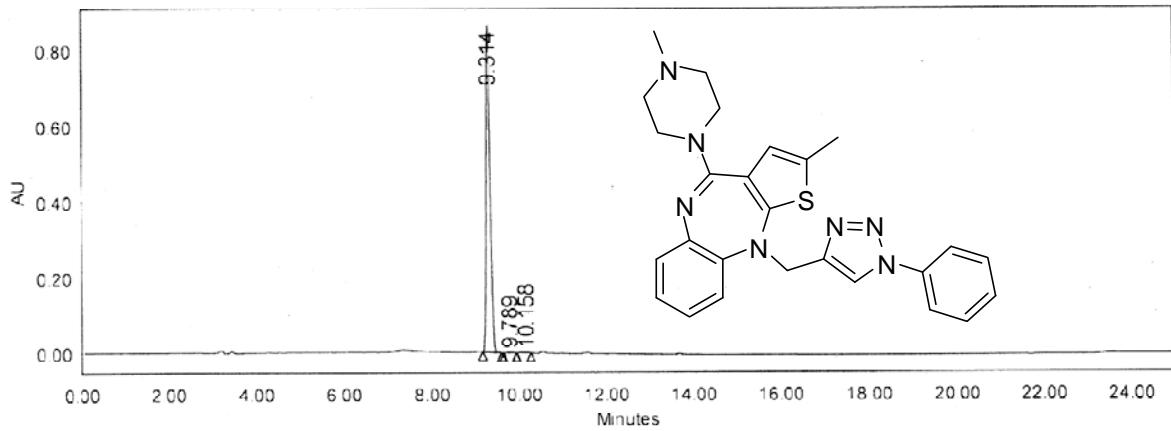

|   | RT     | Area    | % Area | Height |
|---|--------|---------|--------|--------|
| 1 | 9.314  | 5729050 | 99.57  | 861479 |
| 2 | 9.789  | 9838    | 0.17   | 1262   |
| 3 | 10.158 | 15060   | 0.26   | 1391   |

Analyzed By: *M. J. B. S.*

Checked By:



**SAMPLE INFORMATION**

|                   |                          |                     |              |
|-------------------|--------------------------|---------------------|--------------|
| Sample Name:      | ILS/BYS/C106/1-35        | Sample Set Name:    | 230215_1     |
| A R Number:       | CM15B020                 | Acq. Method Set:    | IBT          |
| Vial:             | 8                        | Processing Method:  | IBT PRO      |
| Injection #:      | 1                        | Channel Name:       | 210.0nm@1    |
| Injection Volume: | 5.00 ul                  | Proc. Chnl. Descr.: | PDA 210.0 nm |
| Run Time:         | 25.0 Minutes             |                     |              |
| Date Acquired:    | 2/23/2015 5:28:54 PM IST |                     |              |
| Date Processed:   | 2/23/2015 5:46:27 PM IST |                     |              |

Column: Symmetry C-18 75\*4.6mm 3.5 µm  
 Mobile phase: A) 0.1% TFA in water B) ACN  
 T/%B: 0/10, 2/10, 10/95, 20/95, 22/10, 25/10  
 Flow: 1.0 ml/min, Diluent: ACN: WATER (80:20)

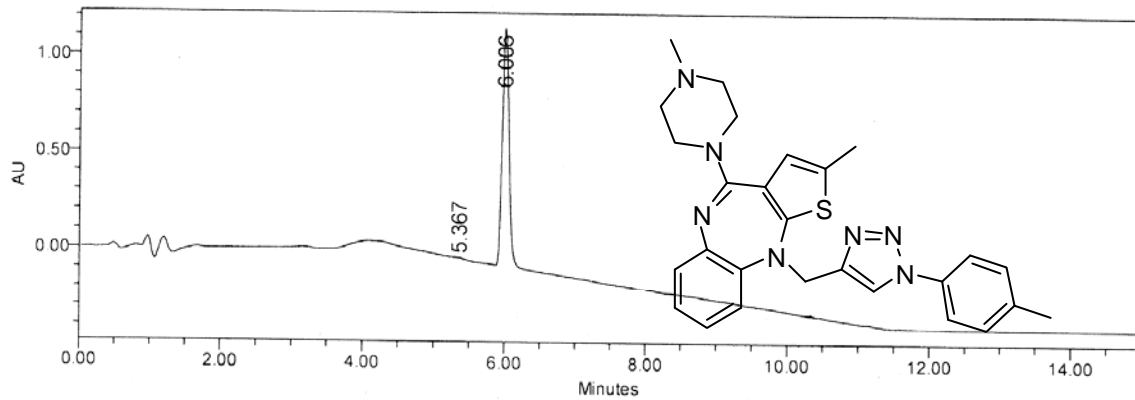

|   | RT    | Area    | % Area | Height  |
|---|-------|---------|--------|---------|
| 1 | 5.367 | 62625   | 0.73   | 6270    |
| 2 | 6.006 | 8076453 | 99.27  | 1231087 |

Analyzed By:

Checked By:

*[Handwritten signature]*  
2/23/2015

**SAMPLE INFORMATION**

|                   |                          |                     |              |
|-------------------|--------------------------|---------------------|--------------|
| Sample Name:      | ILS/BYS/C106/1-44        | Sample Set Name:    | 130315_3     |
| A R Number:       | CM15C025                 | Acq. Method Set:    | LCZ1         |
| Vial:             | 50                       | Processing Method:  | LCZ PRO      |
| Injection #:      | 1                        | Channel Name:       | 240.0nm      |
| Injection Volume: | 5.00 ul                  | Proc. Chnl. Descr.: | PDA 240.0 nm |
| Run Time:         | 25.0 Minutes             |                     |              |
| Date Acquired:    | 3/13/2015 7:05:30 PM IST |                     |              |
| Date Processed:   | 3/16/2015 5:10:31 PM IST |                     |              |

Column: Agilent Eclipse Plus C-18 250\*4.6mm 5µm  
 Mobile phase: A) 0.1% TFA in water B) ACN  
 T/%B: 0/5, 3/5, 10/95, 20/95, 22/5, 25/5  
 Flow: 1.0 ml/min, Diluent: ACN: WATER (80:20)

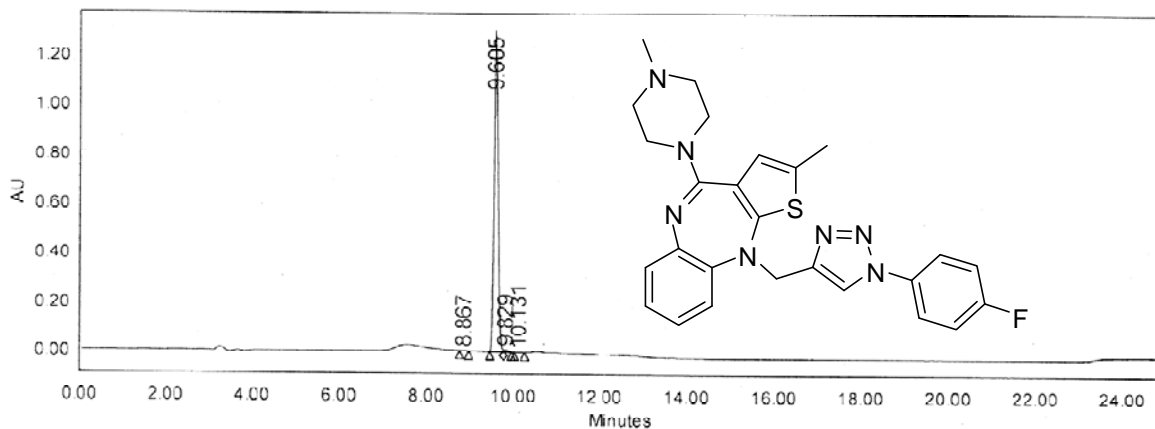

|   | RT     | Area    | % Area | Height  |
|---|--------|---------|--------|---------|
| 1 | 8.867  | 4372    | 0.05   | 637     |
| 2 | 9.605  | 8671458 | 99.37  | 1309640 |
| 3 | 9.829  | 47721   | 0.55   | 6823    |
| 4 | 10.131 | 3156    | 0.04   | 445     |

Analyzed By: *[Signature]*

Checked By:

**SAMPLE INFORMATION**

|                   |                           |                     |              |
|-------------------|---------------------------|---------------------|--------------|
| Sample Name:      | ILS/BYS/C106/1-46         | Sample Set Name:    | 160315       |
| A R Number:       | CM15C026                  | Acq. Method Set:    | LCZ1         |
| Vial:             | 49                        | Processing Method:  | LCZ PRO      |
| Injection #:      | 1                         | Channel Name:       | 254.0nm      |
| Injection Volume: | 15.00 ul                  | Proc. Chnl. Descr.: | PDA 254.0 nm |
| Run Time:         | 25.0 Minutes              |                     |              |
| Date Acquired:    | 3/16/2015 7:14:48 PM IST  |                     |              |
| Date Processed:   | 3/17/2015 11:18:28 AM IST |                     |              |

Column: Agilent Eclipse Plus C-18 250\*4.6mm 5µm  
 Mobile phase: A) 0.1% TFA in water B) ACN  
 T%B: 0/5, 3/5, 10/95, 20/95, 22/5, 25/5  
 Flow: 1.0 ml/min, Diluent: ACN: WATER (80:20)

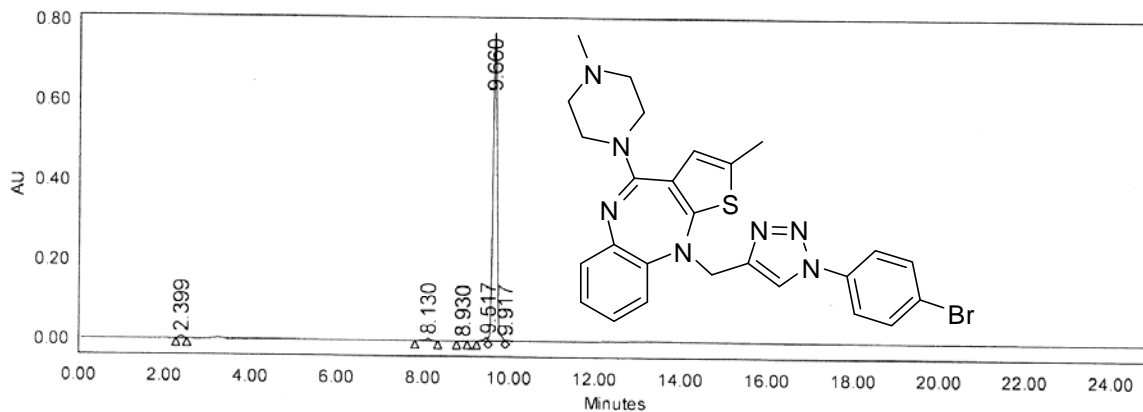

|   | RT    | Area    | % Area | Height |
|---|-------|---------|--------|--------|
| 1 | 2.399 | 43339   | 0.44   | 6573   |
| 2 | 8.130 | 57842   | 0.98   | 5003   |
| 3 | 8.930 | 3595    | 0.06   | 501    |
| 4 | 9.517 | 57121   | 0.57   | 7290   |
| 5 | 9.660 | 4964268 | 97.84  | 773785 |
| 6 | 9.917 | 6666    | 0.11   | 1491   |

Analyzed By: *[Signature]*

Checked By:

**SAMPLE INFORMATION**

|                   |                          |                     |              |
|-------------------|--------------------------|---------------------|--------------|
| Sample Name:      | ILS/BYS/C106/1-45        | Sample Set Name:    | 220715_1     |
| A R Number:       | CM15G006                 | Acq. Method Set:    | MC           |
| Vial:             | 20                       | Processing Method:  | MC_PRO       |
| Injection #:      | 1                        | Channel Name:       | 260.0nm      |
| Injection Volume: | 5.00 ul                  | Proc. Chnl. Descr.: | PDA 260.0 nm |
| Run Time:         | 12.0 Minutes             |                     |              |
| Date Acquired:    | 7/22/2015 2:26:52 PM IST |                     |              |
| Date Processed:   | 7/22/2015 3:23:24 PM IST |                     |              |

Column: Symmetry C-18 75\*4.6mm 3.5µm  
 Mobile phase: A) 0.1% TFA in water B) ACN  
 T/%B: 0/20, 0.5/20, 2/95, 8/95, 10/20, 12/20  
 Flow: 1.0 ml /min, Diluent: ACN: WATER (90:10)

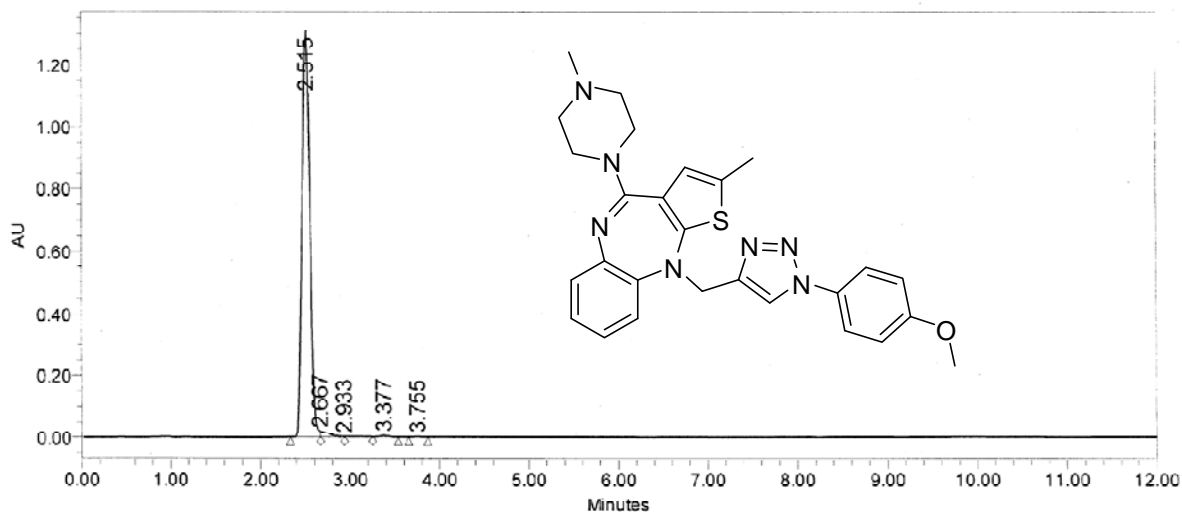

| RT      | Area    | % Area | Height  |
|---------|---------|--------|---------|
| 1 2.515 | 7930666 | 97.83  | 1298872 |
| 2 2.667 | 121683  | 1.50   | 18900   |
| 3 2.933 | 19434   | 0.24   | 1490    |
| 4 3.377 | 30163   | 0.37   | 4145    |
| 5 3.755 | 4719    | 0.06   | 745     |

Analyzed By: *[Signature]*

Checked By:

**SAMPLE INFORMATION**

|                   |                         |                     |              |
|-------------------|-------------------------|---------------------|--------------|
| Sample Name:      | ILS/BYS/C106/1-39       | Sample Set Name:    | 040315_1     |
| A R Number:       | CM15C008                | Acq. Method Set:    | ERB_L1       |
| Vial:             | 47                      | Processing Method:  | LCZ PRO      |
| Injection #:      | 1                       | Channel Name:       | 265.0nm      |
| Injection Volume: | 5.00 ul                 | Proc. Chnl. Descr.: | PDA 265.0 nm |
| Run Time:         | 25.0 Minutes            |                     |              |
| Date Acquired:    | 3/4/2015 5:20:51 PM IST |                     |              |
| Date Processed:   | 3/5/2015 1:06:54 PM IST |                     |              |

Column: Agilent Eclipse Plus C-18 250\*4.6mm 5µm  
 Mobile phase: A) 0.1% TFA in water B) ACN  
 T/%B: 0/5, 3/5, 10/95, 20/95, 22/5, 25/5  
 Flow: 1.0 ml/min, Diluent: ACN: WATER (80:20)

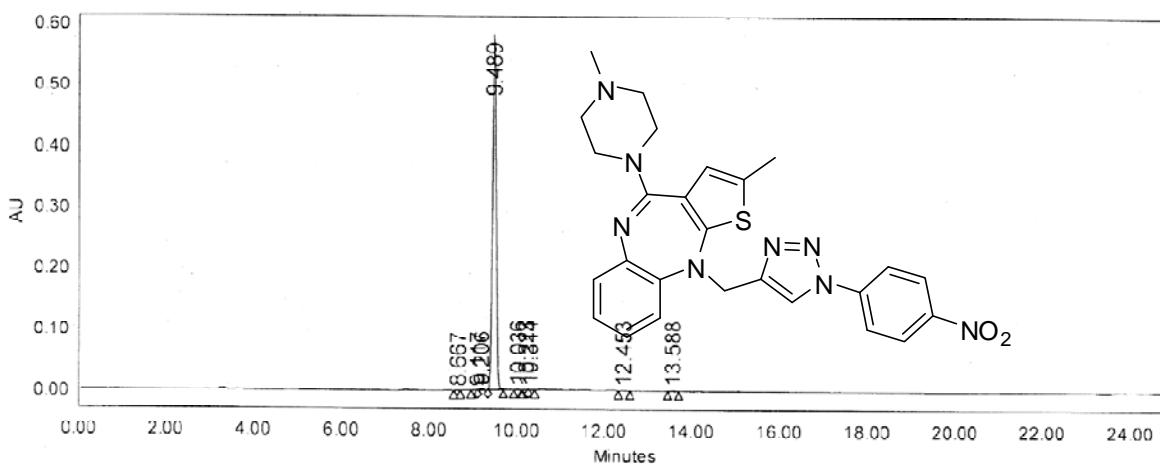

|   | RT     | Area    | % Area | Height |
|---|--------|---------|--------|--------|
| 1 | 8.667  | 1045    | 0.03   | 191    |
| 2 | 9.117  | 1424    | 0.04   | 291    |
| 3 | 9.206  | 7530    | 0.21   | 1158   |
| 4 | 9.489  | 3569888 | 99.27  | 580241 |
| 5 | 10.036 | 1789    | 0.05   | 313    |
| 6 | 10.223 | 1101    | 0.03   | 198    |
| 7 | 10.314 | 1247    | 0.03   | 208    |
| 8 | 12.453 | 3828    | 0.11   | 520    |
| 9 | 13.588 | 8113    | 0.23   | 1192   |

Analyzed By:

Checked By:

*[Handwritten signature]*  
3/5/2015

**SAMPLE INFORMATION**

|                   |                          |                     |              |
|-------------------|--------------------------|---------------------|--------------|
| Sample Name:      | ILS/BYS/C106/1-47        | Sample Set Name:    | 220715_1     |
| A R Number:       | CM15G007                 | Acq. Method Set:    | MC           |
| Vial:             | 19                       | Processing Method:  | MC_PRO       |
| Injection #:      | 1                        | Channel Name:       | 260.0nm      |
| Injection Volume: | 5.00 ul                  | Proc. Chnl. Descr.: | PDA 260.0 nm |
| Run Time:         | 12.0 Minutes             |                     |              |
| Date Acquired:    | 7/22/2015 2:10:45 PM IST |                     |              |
| Date Processed:   | 7/22/2015 3:22:37 PM IST |                     |              |

Column: Symmetry C-18 75\*4.6mm 3.5µm  
 Mobile phase: A) 0.1% TFA in water B) ACN  
 T1%B: 0/20, 0.5/20, 2/95, 8/95, 10/20, 12/20  
 Flow: 1.0 ml /min, Diluent: ACN: WATER (90:10)

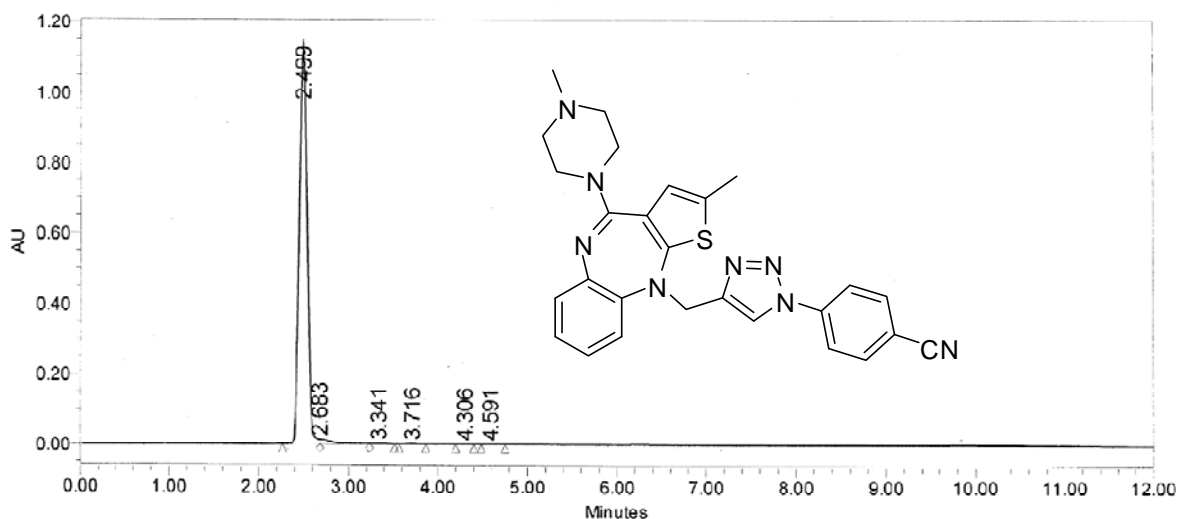

|   | RT    | Area    | % Area | Height  |
|---|-------|---------|--------|---------|
| 1 | 2.499 | 6944243 | 97.72  | 1139499 |
| 2 | 2.683 | 139930  | 1.97   | 13568   |
| 3 | 3.341 | 9120    | 0.13   | 760     |
| 4 | 3.716 | 8725    | 0.12   | 1143    |
| 5 | 4.306 | 1994    | 0.03   | 340     |
| 6 | 4.591 | 2024    | 0.03   | 264     |

*M. 22/7/15*  
 Analyzed By.

Checked By:

**SAMPLE INFORMATION**

|                   |                          |                     |                               |
|-------------------|--------------------------|---------------------|-------------------------------|
| Sample Name:      | ILS-BYS-C106-1-48        | Sample Set Name:    | 290515_1                      |
| Sample Type:      | CM15E045                 | Acq. Method Set:    | MC                            |
| Vial:             | 38                       | Processing Method:  | MC PRO                        |
| Injection #:      | 1                        | Channel Name:       | 210.0nm                       |
| Injection Volume: | 12.00 ul                 | Proc. Chnl. Descr.: | PDA 210.0 nm Blank Subtracted |
| Run Time:         | 12.0 Minutes             |                     |                               |
| Date Acquired:    | 5/29/2015 2:50:52 PM IST |                     |                               |
| Date Processed:   | 5/29/2015 3:08:31 PM IST |                     |                               |

Column: X Bridge C18 150\*4.6mm 5µm  
 Mobile phase: A) 0.1% TFA in water B) ACN  
 T/%B: 0/20, 0.5/20, 2/95, 8/95, 10/20, 12/20  
 Flow: 1.0 ml /min, Diluent: ACN: WATER (90:10)

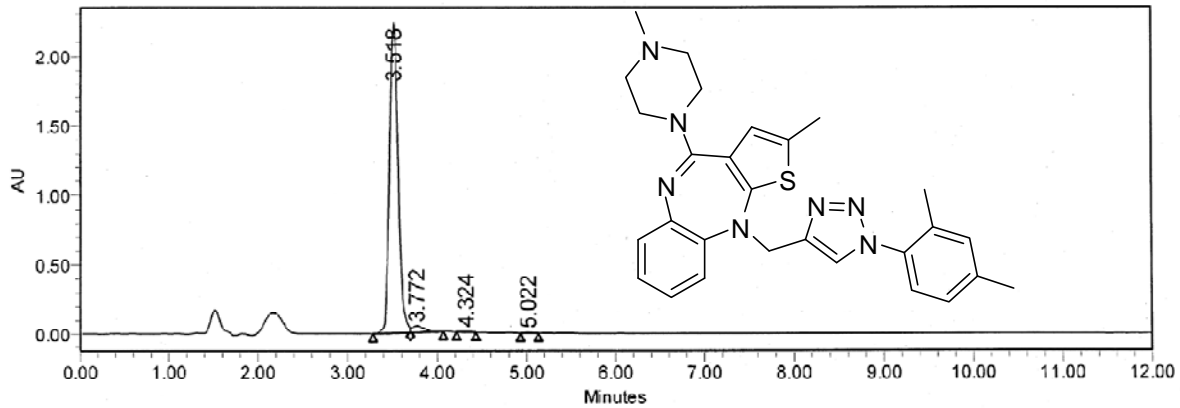

|   | RT    | Area     | % Area | Height  |
|---|-------|----------|--------|---------|
| 1 | 3.518 | 15024183 | 96.20  | 2232434 |
| 2 | 3.772 | 483122   | 3.09   | 46865   |
| 3 | 4.324 | 63383    | 0.41   | 9188    |
| 4 | 5.022 | 46423    | 0.30   | 7919    |

Analyzed By: *M. S. Srinivas*

Checked By:

SAMPLE INFORMATION

|                   |                           |                    |              |
|-------------------|---------------------------|--------------------|--------------|
| Sample Name:      | ILS-SBN-T-4               | Sample Set Name:   | 140515       |
| Sample Type:      | CM15E022                  | Acq. Method Set:   | MC           |
| Vial:             | 4                         | Processing Method: | MC_PRO       |
| Injection #:      | 1                         | Channel Name:      | 250.0nm      |
| Injection Volume: | 15.00 ul                  | Proc. Chnl. Descr: | PDA 250.0 nm |
| Run Time:         | 12.0 Minutes              |                    |              |
| Date Acquired:    | 5/14/2015 1:28:18 PM IST  |                    |              |
| Date Processed:   | 5/15/2015 11:56:58 AM IST |                    |              |

Column: Symmetry C-18 75\*4.6mm 3.5µm  
 Mobile phase: A) 0.1% TFA in water B) ACN  
 T/%B: 0/20, 0.5/20, 2/95, 8/95, 10/20, 12/20  
 Flow: 1.0 ml/min, Diluent: ACN:WATER (90:10)

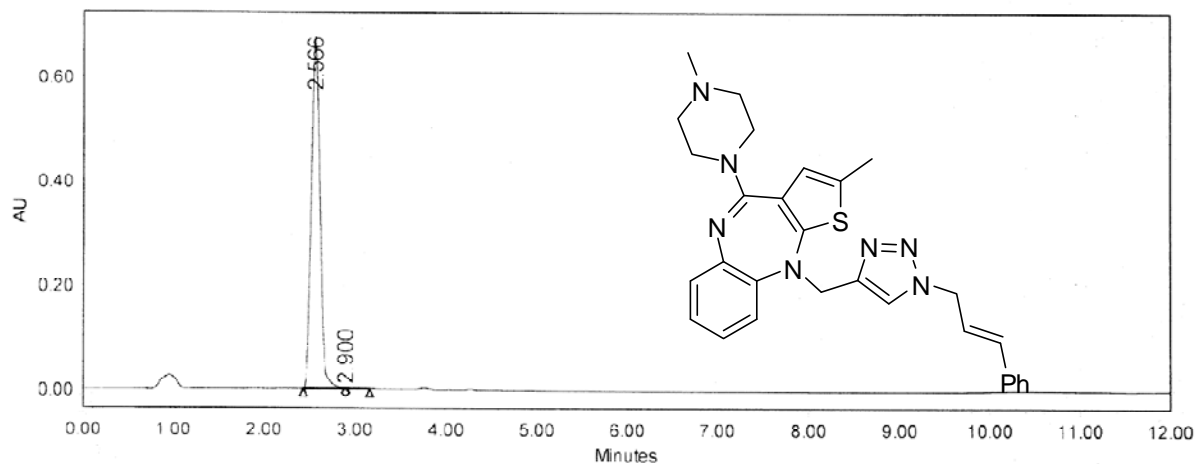

|   | RT    | Area    | % Area | Height |
|---|-------|---------|--------|--------|
| 1 | 2.566 | 4499005 | 99.74  | 683227 |
| 2 | 2.900 | 11534   | 0.26   | 1713   |

Analyzed By

*Qf 15/05/15*

Checked By:



**SAMPLE INFORMATION**

|                   |                           |                     |                               |
|-------------------|---------------------------|---------------------|-------------------------------|
| Sample Name:      | ILS-SBN-T-5               | Sample Set Name:    | 250515                        |
| Sample Type:      | CM15E030                  | Acq. Method Set:    | MC                            |
| Vial:             | 29                        | Processing Method:  | MC PRO                        |
| Injection #:      | 1                         | Channel Name:       | 205.0nm                       |
| Injection Volume: | 5.00 ul                   | Proc. Chnl. Descr.: | PDA 205.0 nm Blank Subtracted |
| Run Time:         | 12.0 Minutes              |                     |                               |
| Date Acquired:    | 5/25/2015 10:27:51 AM IST |                     |                               |
| Date Processed:   | 5/25/2015 12:09:00 PM IST |                     |                               |

Column: Symmetry C-18 75\*4.6mm 3.5µm  
 Mobile phase: A) 0.1% TFA in water B) ACN  
 T/%B: 0/20, 0.5/20, 2/95, 8/95, 10/20, 12/20  
 Flow: 1.0 ml/min, Diluent: ACN: WATER (90:10)

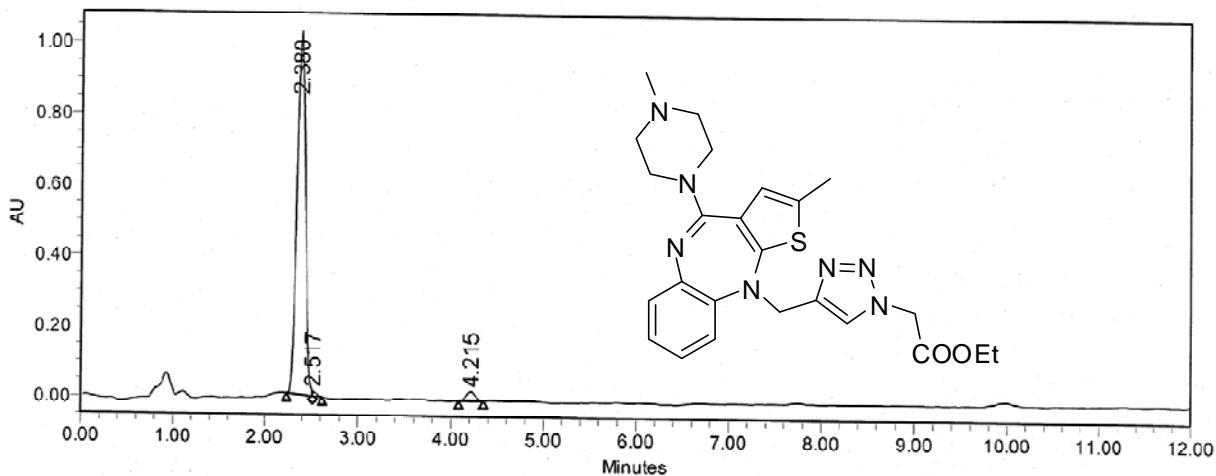

|   | RT    | Area    | % Area | Height  |
|---|-------|---------|--------|---------|
| 1 | 2.380 | 6359387 | 96.85  | 1016727 |
| 2 | 2.517 | 39160   | 0.60   | 13812   |
| 3 | 4.215 | 167628  | 2.55   | 25902   |

Analyzed By:

Checked By:

*QJF 25/05/15*

SAMPLE INFORMATION

|                   |                          |                     |              |
|-------------------|--------------------------|---------------------|--------------|
| Sample Name:      | ILS/BYS/C100/1-37        | Sample Set Name:    | 020315_3     |
| A R Number:       | CM15C007                 | Acq. Method Set:    | ERB_L1       |
| Vial:             | 4                        | Processing Method:  | LCZ PRO      |
| Injection #:      | 1                        | Channel Name:       | 240 0nm      |
| Injection Volume: | 7.00 ul                  | Proc. Chnl. Descr.: | PDA 240.0 nm |
| Run Time:         | 25.0 Minutes             |                     |              |
| Date Acquired:    | 3/2/2015 8:34:26 PM IST  |                     |              |
| Date Processed:   | 3/3/2015 10:11:32 AM IST |                     |              |

Column: Agilent Eclipse Plus C-18 250\*4.6mm 5µm  
 Mobile phase: A) 0.1% TFA in water B) ACN  
 T/A/B: 0/5, 3/5, 10/95, 20/95, 22/5, 25/5  
 Flow: 1.0 ml/min, Diluent: ACN: WATER (80:20)

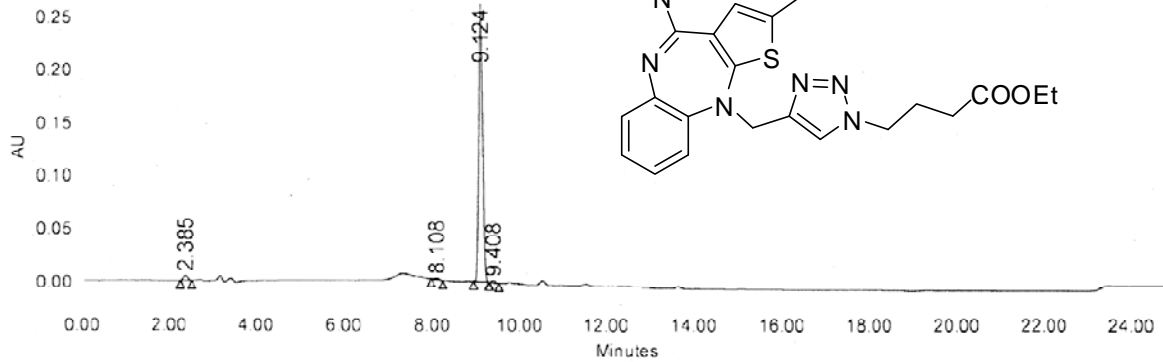

|   | RT    | Area    | % Area | Height |
|---|-------|---------|--------|--------|
| 1 | 2.385 | 31800   | 1.82   | 4893   |
| 2 | 8.108 | 8631    | 0.49   | 1184   |
| 3 | 9.124 | 1698352 | 97.15  | 264114 |
| 4 | 9.408 | 9423    | 0.54   | 1615   |

Analyzed By:

Checked By:

*Handwritten signature and date: 3/3/15*
