# Supplementary material for: 1,2,3-Triazoles derived from olanzapine: their synthesis via an ultrasound assisted CuAAC method and evaluation as inhibitors of PDE4B
Source: Royal Society of Chemistry journal article supplement (doi:10.1039/c5ra20380e), 2015-01-01

## HSQC of 3c

ILS-BYS-C106-T-1 in CDCl<sub>3</sub>  
HSQC EXPT.  
A.R.No : NM15H090  
Sample Name:  
Data Collected on:  
DRILS-vnmr400  
Archive directory:  
Sample directory:  
Fidfile: HSQCAD  
Pulse Sequence: HSQCAD  
Solvent: cdcl3  
Data collected on: Aug 18 2015

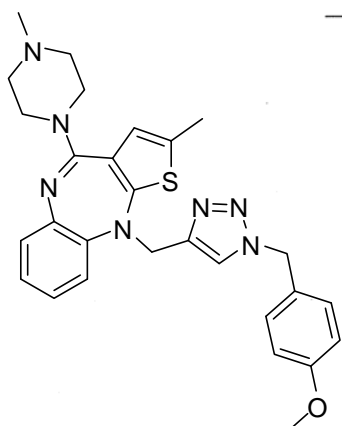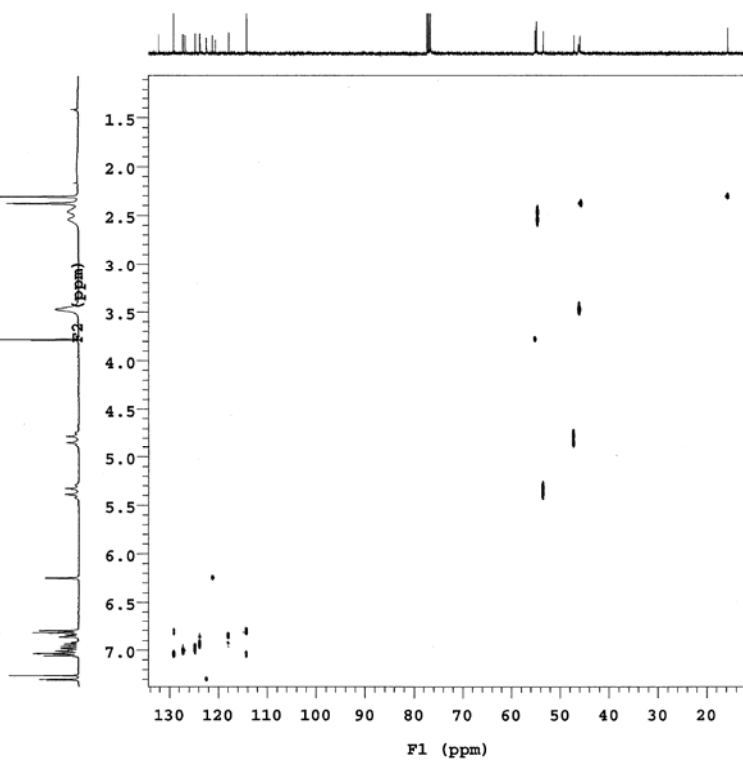

# DEPT of 3c

ILS-BYS-C106-T-1 in CDCl3  
 DEPT EXPT.  
 A.R.NO: NA15H090-3  
 Sample Name:  
 Data Collected on:  
 DRILS-vnmrs400  
 Archive directory:  
 Sample directory:  
 Fidfile: DEPT  
 Pulse Sequence: DEPT  
 Solvent: cdcl3  
 Data collected on: Aug 18 2015

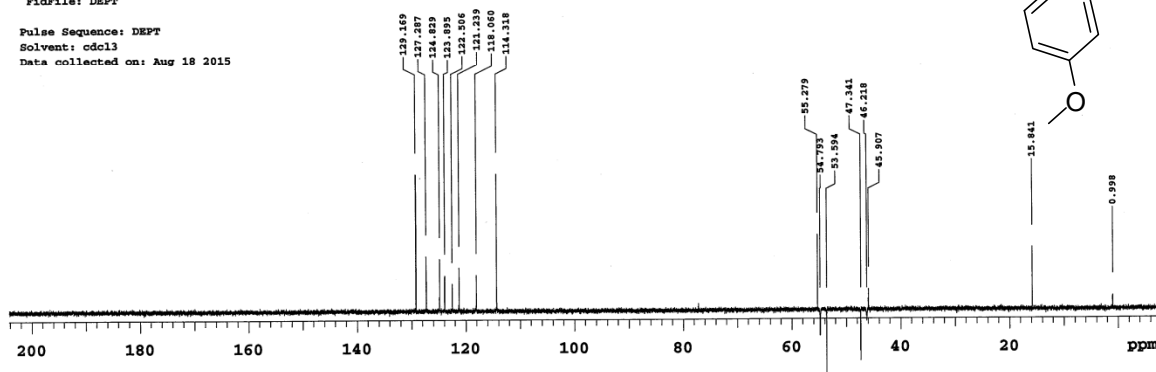

The compound **3c** was characterized by spectral data. Some of its  $^1\text{H}$ NMR (red) and  $^{13}\text{C}$ NMR (blue) signals obtained are shown below

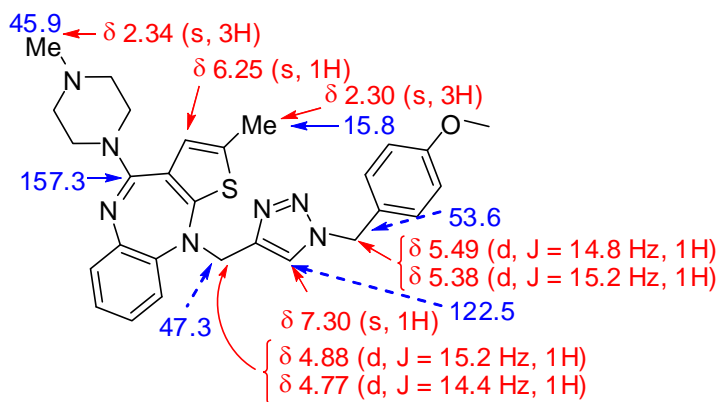

Supplement: c5ra20380e3.pdf [file c5ra20380e3.pdf]
